# Supplementary material
Source: PubMed Central journal article supplement (PMC3946369)

## Supporting Information for

### **Secoemestrin D, A Cytotoxic Epitetrahydrodioxopiperazine and Emericellenes A–E, Five Sesterterpenoids from *Emericella* sp. AST0036, a Fungal Endophyte of *Astragalus lentiginosus*<sup>1</sup>**

Ya-ming Xu,<sup>†</sup> Patricia Espinosa-Artiles,<sup>†</sup> Mangping X. Liu,<sup>†</sup> A. Elizabeth Arnold,<sup>‡</sup> and A. A. Leslie Gunatilaka<sup>†,\*</sup>

<sup>†</sup>Southwest Center for Natural Products Research and Commercialization, School of Natural Resources and the Environment, College of Agriculture and Life Sciences, University of Arizona, 250 E. Valencia Road, Tucson, Arizona 85706, United States

<sup>‡</sup>School of Plant Sciences, College of Agriculture and Life Sciences, University of Arizona, Tucson, Arizona 85721, United States

## Table of Contents

|                                                                                                                                                                                                                                           |     |
|-------------------------------------------------------------------------------------------------------------------------------------------------------------------------------------------------------------------------------------------|-----|
| <b>Figure S1.</b> <sup>1</sup> H NMR Spectrum (400 MHz) of Secoemestrin D ( <b>1</b> ) in CDCl <sub>3</sub> .....                                                                                                                         | S2  |
| <b>Figure S2.</b> <sup>13</sup> C NMR Spectrum (100 MHz) of Secoemestrin D ( <b>1</b> ) in CDCl <sub>3</sub> .....                                                                                                                        | S3  |
| <b>Figure S3.</b> HSQC Spectrum (400 MHz) of Secoemestrin D ( <b>1</b> ) A in CDCl <sub>3</sub> .....                                                                                                                                     | S4  |
| <b>Figure S4.</b> HMBC Spectrum (400 MHz) of Secoemestrin D ( <b>1</b> ) A in CDCl <sub>3</sub> .....                                                                                                                                     | S5  |
| <b>Figure S5.</b> <sup>1</sup> H NMR Spectrum (400 MHz) of Emericellene A ( <b>2</b> ) in CDCl <sub>3</sub> .....                                                                                                                         | S6  |
| <b>Figure S6.</b> <sup>13</sup> C NMR Spectrum (100 MHz) of Emericellene A ( <b>2</b> ) in CDCl <sub>3</sub> .....                                                                                                                        | S7  |
| <b>Figure S7.</b> HSQC Spectrum (400 MHz) of Emericellene A ( <b>2</b> ) in CDCl <sub>3</sub> .....                                                                                                                                       | S8  |
| <b>Figure S8.</b> HMBC Spectrum (400 MHz) of Emericellene A ( <b>2</b> ) in CDCl <sub>3</sub> .....                                                                                                                                       | S9  |
| <b>Figure S9.</b> <sup>1</sup> H NMR Spectrum (400 MHz) of Emericellene B ( <b>3</b> ) in CDCl <sub>3</sub> .....                                                                                                                         | S10 |
| <b>Figure S10.</b> <sup>13</sup> C NMR Spectrum (100 MHz) of Emericellene B ( <b>3</b> ) in CDCl <sub>3</sub> .....                                                                                                                       | S11 |
| <b>Figure S11.</b> HSQC Spectrum (400 MHz) of Emericellene B ( <b>3</b> ) in CDCl <sub>3</sub> .....                                                                                                                                      | S12 |
| <b>Figure S12.</b> HMBC Spectrum (400 MHz) of Emericellene B ( <b>3</b> ) in CDCl <sub>3</sub> .....                                                                                                                                      | S13 |
| <b>Figure S13.</b> <sup>1</sup> H NMR Spectrum (400 MHz) of Emericellene C ( <b>4</b> ) in CDCl <sub>3</sub> .....                                                                                                                        | S14 |
| <b>Figure S14.</b> <sup>13</sup> C NMR Spectrum (100 MHz) of Emericellene C ( <b>4</b> ) in CDCl <sub>3</sub> .....                                                                                                                       | S15 |
| <b>Figure S15.</b> HSQC Spectrum (400 MHz) of Emericellene C ( <b>4</b> ) in CDCl <sub>3</sub> .....                                                                                                                                      | S16 |
| <b>Figure S16.</b> HMBC Spectrum (400 MHz) of Emericellene C ( <b>4</b> ) in CDCl <sub>3</sub> .....                                                                                                                                      | S17 |
| <b>Figure S17.</b> <sup>1</sup> H NMR Spectrum (400 MHz) of Emericellene D ( <b>5</b> ) in CDCl <sub>3</sub> .....                                                                                                                        | S18 |
| <b>Figure S18.</b> <sup>13</sup> C NMR Spectrum (100 MHz) of Emericellene D ( <b>5</b> ) in CDCl <sub>3</sub> .....                                                                                                                       | S19 |
| <b>Figure S19.</b> HSQC Spectrum (400 MHz) of Emericellene D ( <b>5</b> ) in CDCl <sub>3</sub> .....                                                                                                                                      | S20 |
| <b>Figure S20.</b> HMBC Spectrum (400 MHz) of Emericellene D ( <b>5</b> ) in CDCl <sub>3</sub> .....                                                                                                                                      | S21 |
| <b>Figure S21.</b> <sup>1</sup> H NMR Spectrum (400 MHz) of Emericellene E ( <b>6</b> ) in CDCl <sub>3</sub> .....                                                                                                                        | S22 |
| <b>Figure S22.</b> <sup>13</sup> C NMR Spectrum (100 MHz) of Emericellene E ( <b>6</b> ) in CDCl <sub>3</sub> .....                                                                                                                       | S23 |
| <b>Figure S23.</b> HSQC Spectrum (400 MHz) of Emericellene E ( <b>6</b> ) in CDCl <sub>3</sub> .....                                                                                                                                      | S24 |
| <b>Figure S24.</b> HMBC Spectrum (400 MHz) of Emericellene E ( <b>6</b> ) in CDCl <sub>3</sub> .....                                                                                                                                      | S25 |
| <b>Figure S25.</b> Key NOE Correlations of Emericellenes B-E ( <b>3-6</b> ).....                                                                                                                                                          | S26 |
| <b>Figure S26.</b> Key NOE Correlations of Emericellenes B-E ( <b>3-6</b> ).....                                                                                                                                                          | S27 |
| <b>Figure S27.</b> Probable Biosynthetic Conversion of Emericellene B ( <b>3</b> ) to Emericellenes C-E ( <b>4-6</b> ).....                                                                                                               | S28 |
| <b>Figure S28.</b> Results of Maximum Likelihood Analysis of ITSrDNA Data Revealing Strongly Supported Placement of AST0036 in <i>Emericella</i> . Values above Branches Indicate Relevant Maximum Likelihood Bootstrap Support >70%..... | S29 |

**Figure S1.**  $^1\text{H}$  NMR Spectrum (400 MHz) of Secoemestrin D (**1**) in  $\text{CDCl}_3$

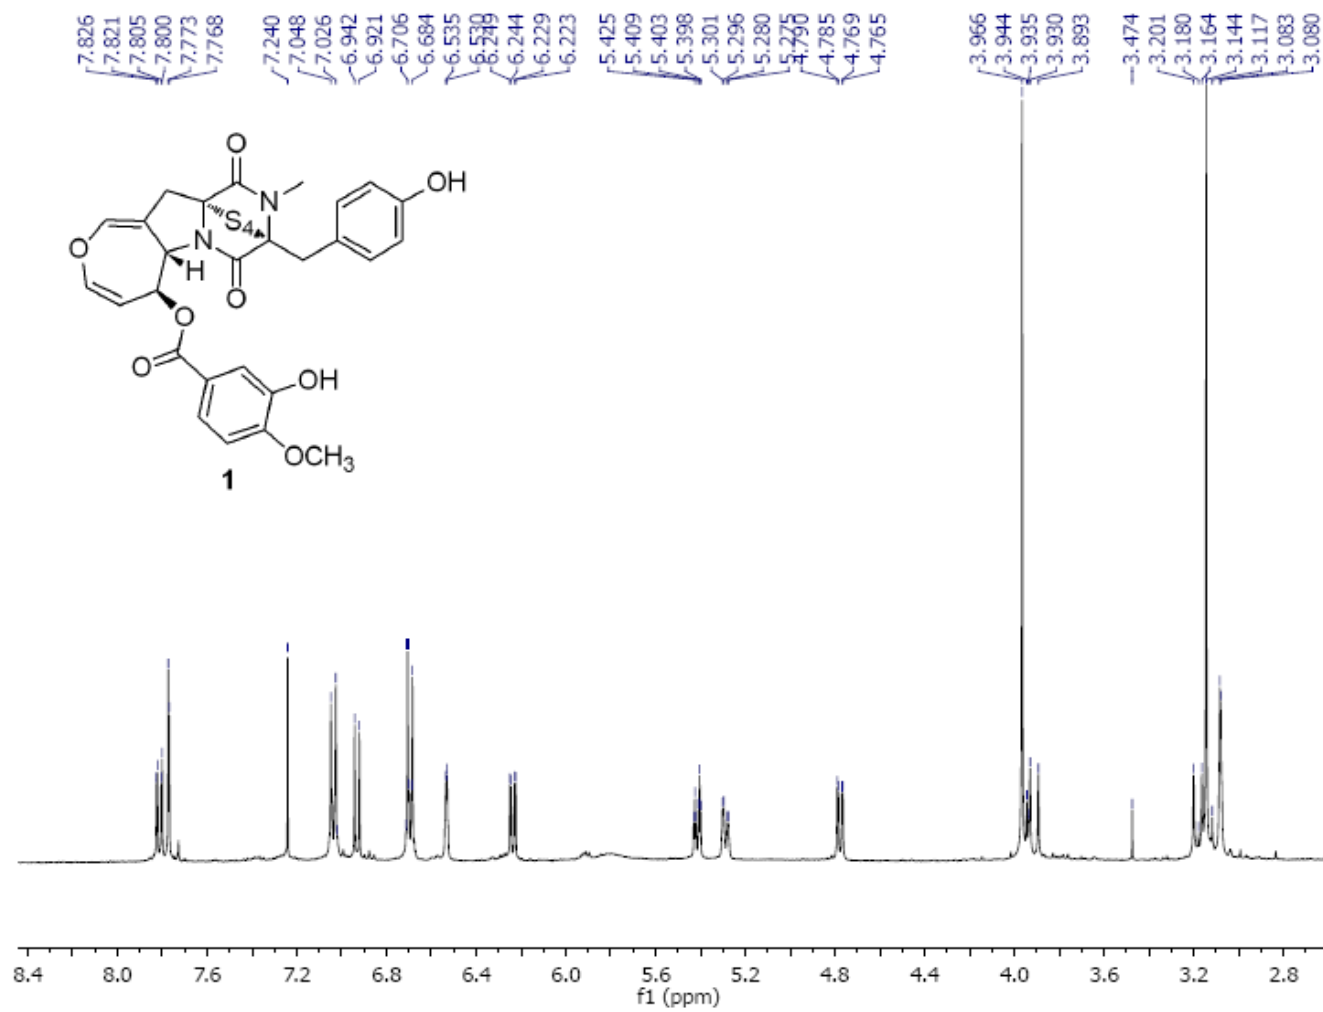

**Figure S2.**  $^{13}\text{C}$  NMR Spectrum (100 MHz) of Secoemestrin D (**1**) in  $\text{CDCl}_3$

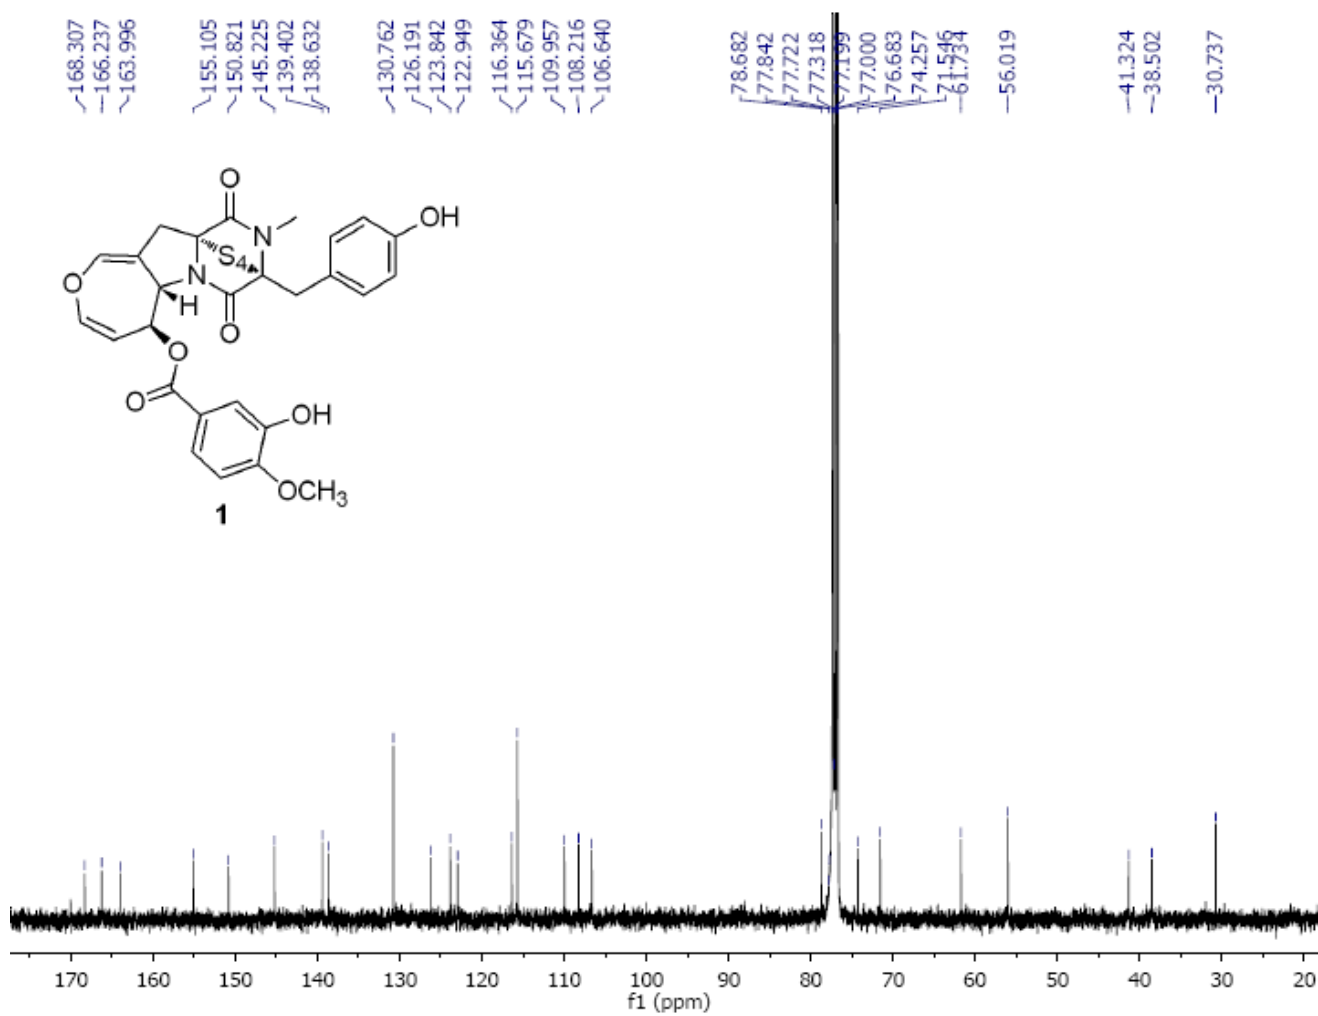

168.307  
166.237  
163.996  
155.105  
150.821  
145.225  
139.402  
138.632  
130.762  
126.191  
123.842  
122.949  
116.364  
115.679  
109.957  
108.216  
106.640

78.682  
77.842  
77.722  
77.318  
77.199  
77.000  
76.683  
74.257  
61.546  
61.534  
56.019  
41.324  
38.502  
30.737

Figure S3. HSQC Spectrum (400 MHz) of Secoemestrin D (1) A in CDCl<sub>3</sub>

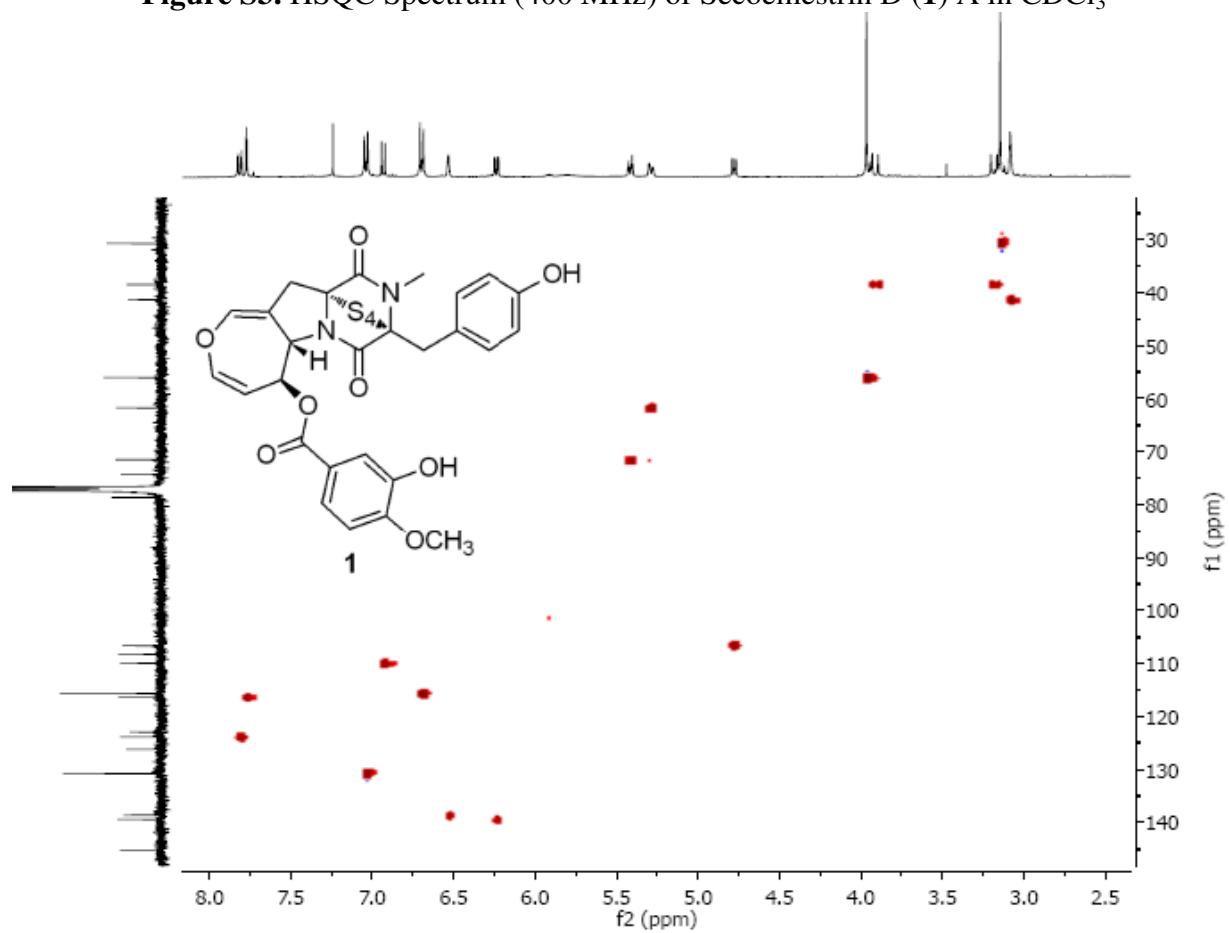

**Figure S4.** HMBC Spectrum (400 MHz) of Secoemestrin D (1) A in CDCl<sub>3</sub>

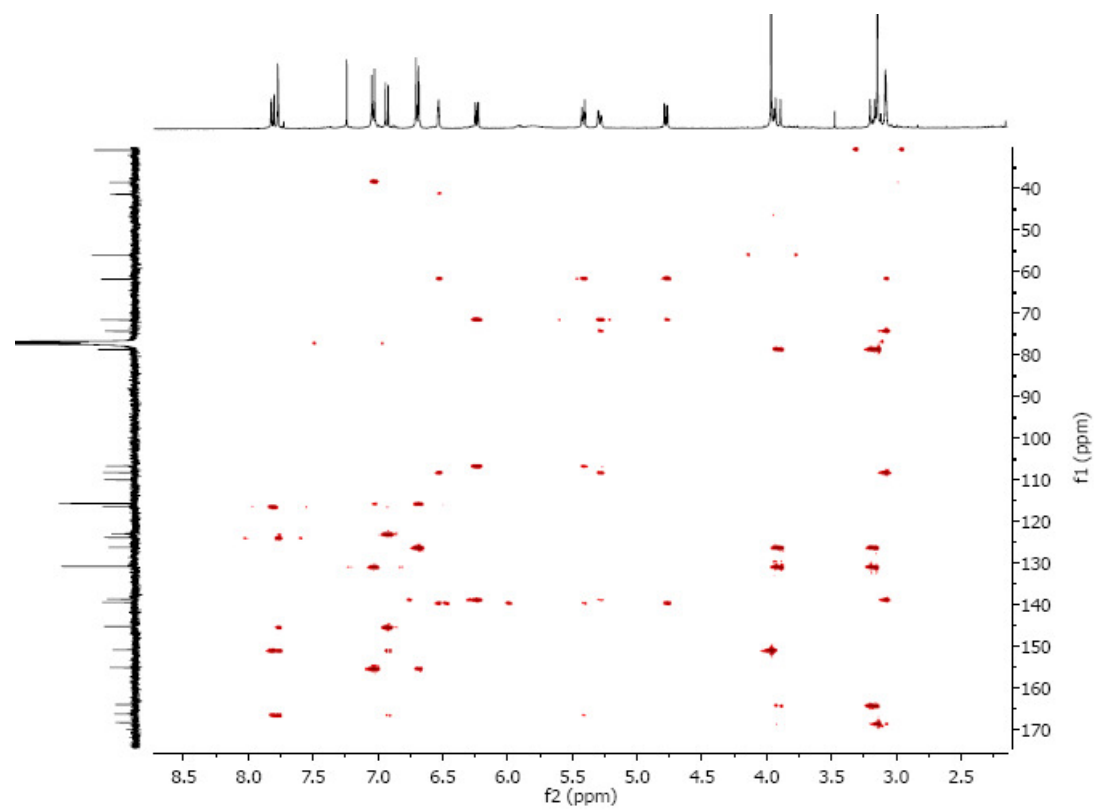

Figure S5.  $^1\text{H}$  NMR Spectrum (400 MHz) of Emericellene A (**2**) in  $\text{CDCl}_3$

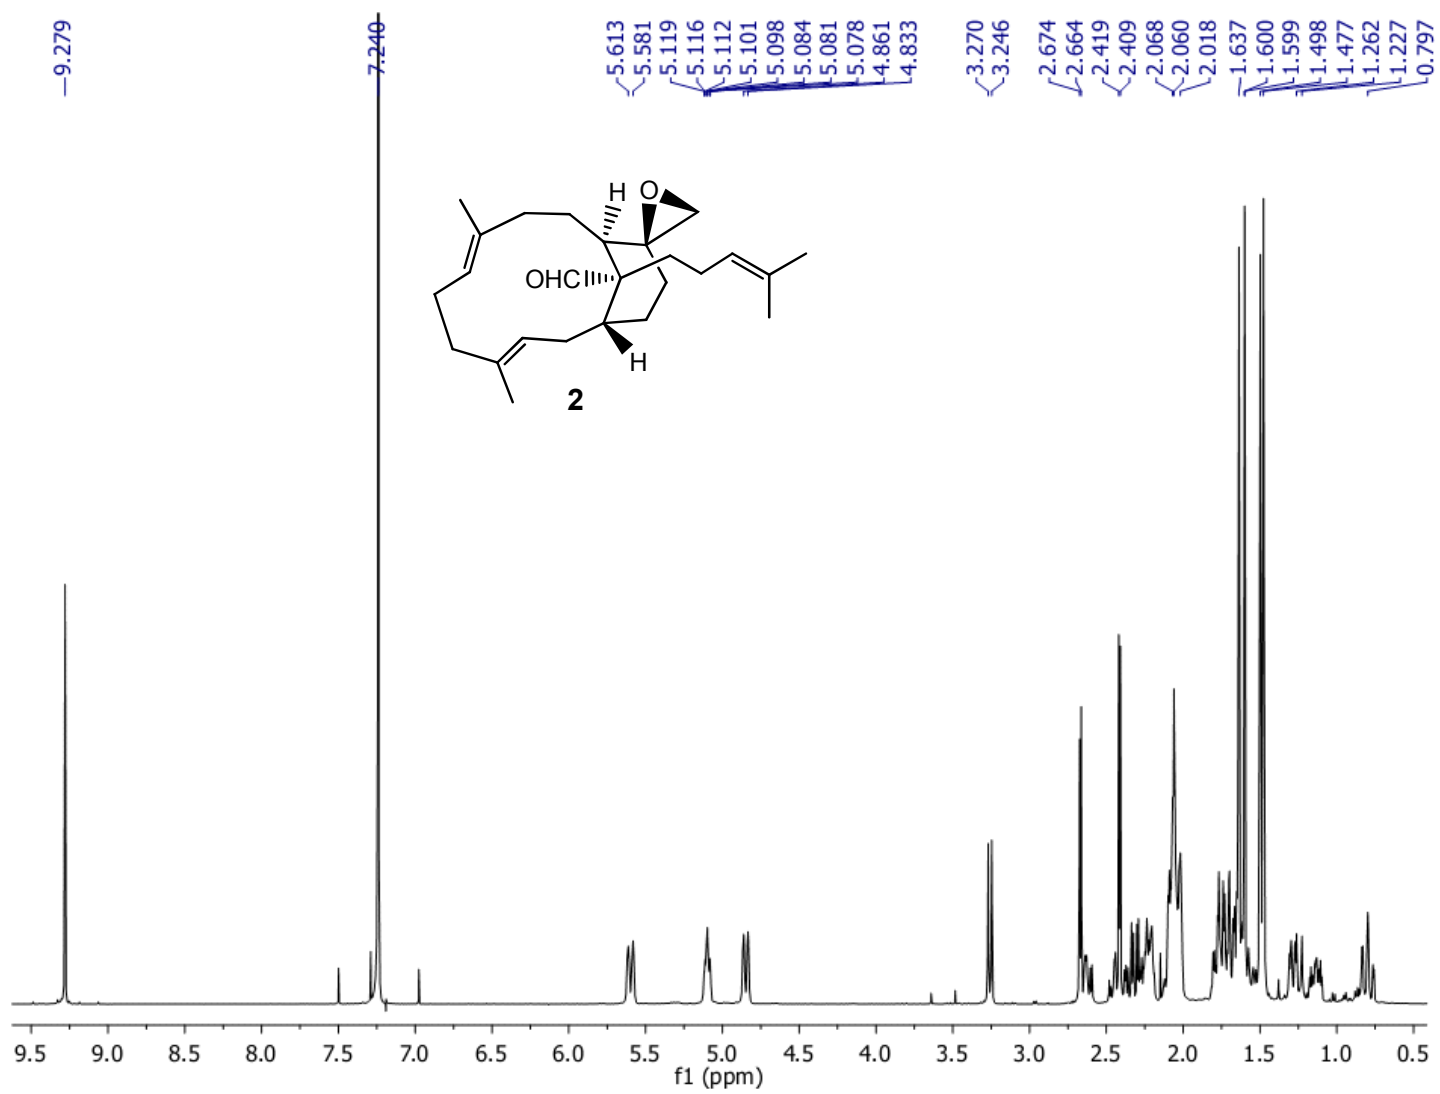

**Figure S6.**  $^{13}\text{C}$  NMR Spectrum (100 MHz) of Emericellene A (**2**) in  $\text{CDCl}_3$

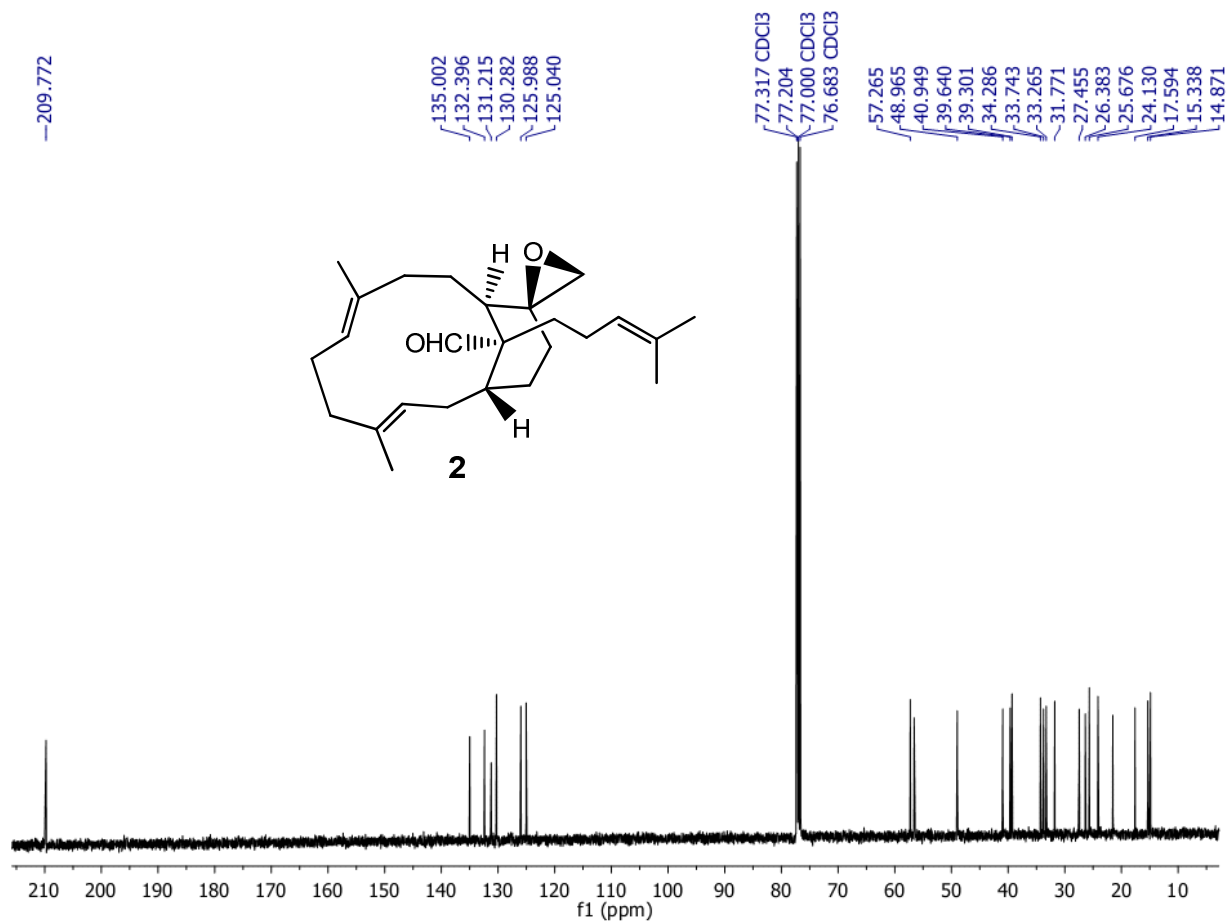



**Figure S7.** HSQC Spectrum (400 MHz) of Emericellene A (**2**) in CDCl<sub>3</sub>

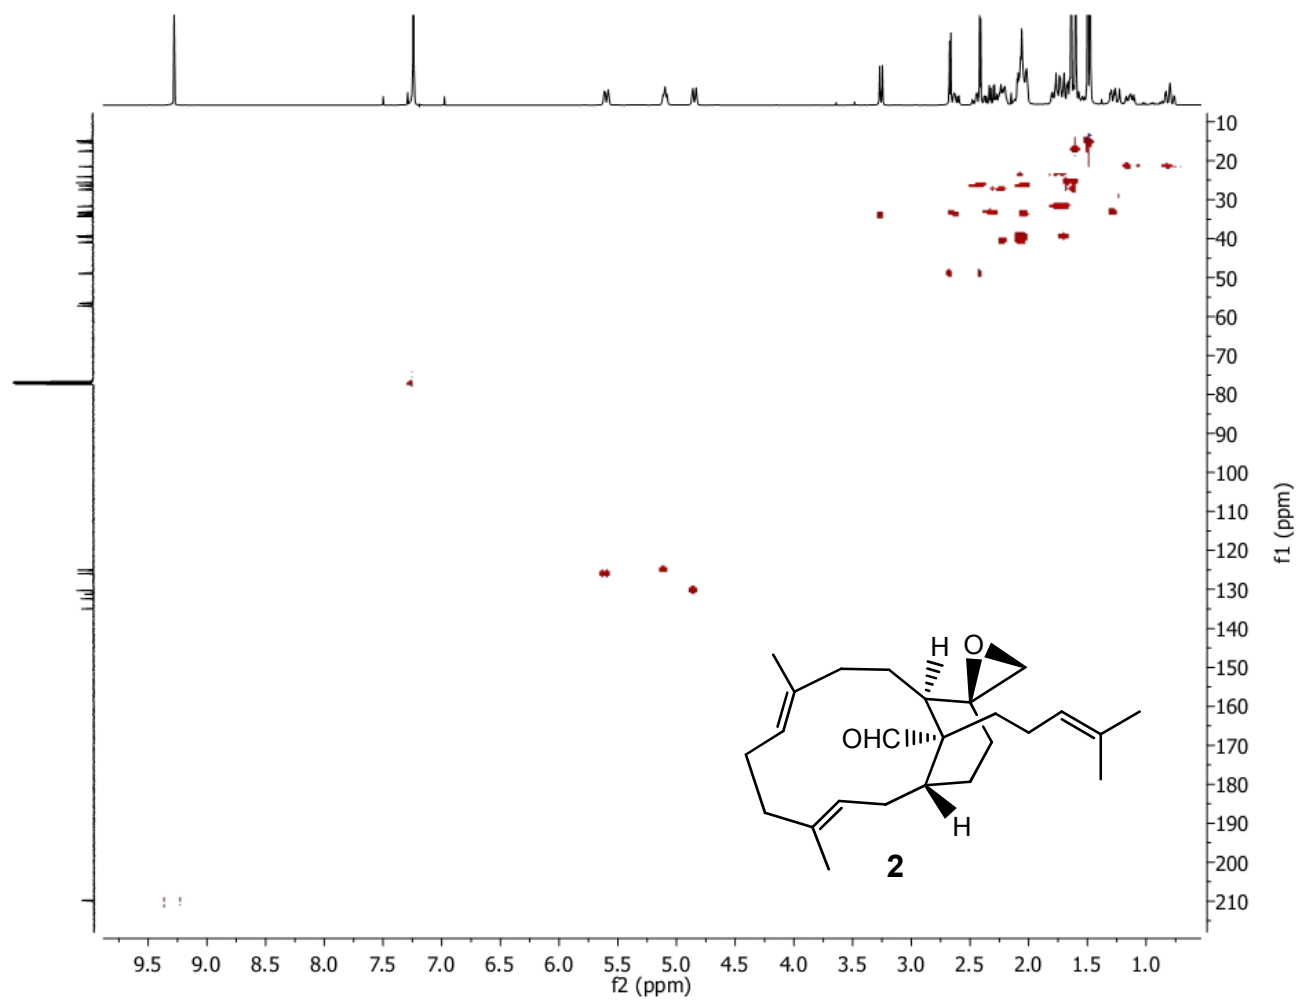

**Figure S8.** HMBC Spectrum (400 MHz) of Emericellene A (**2**) in CDCl<sub>3</sub>

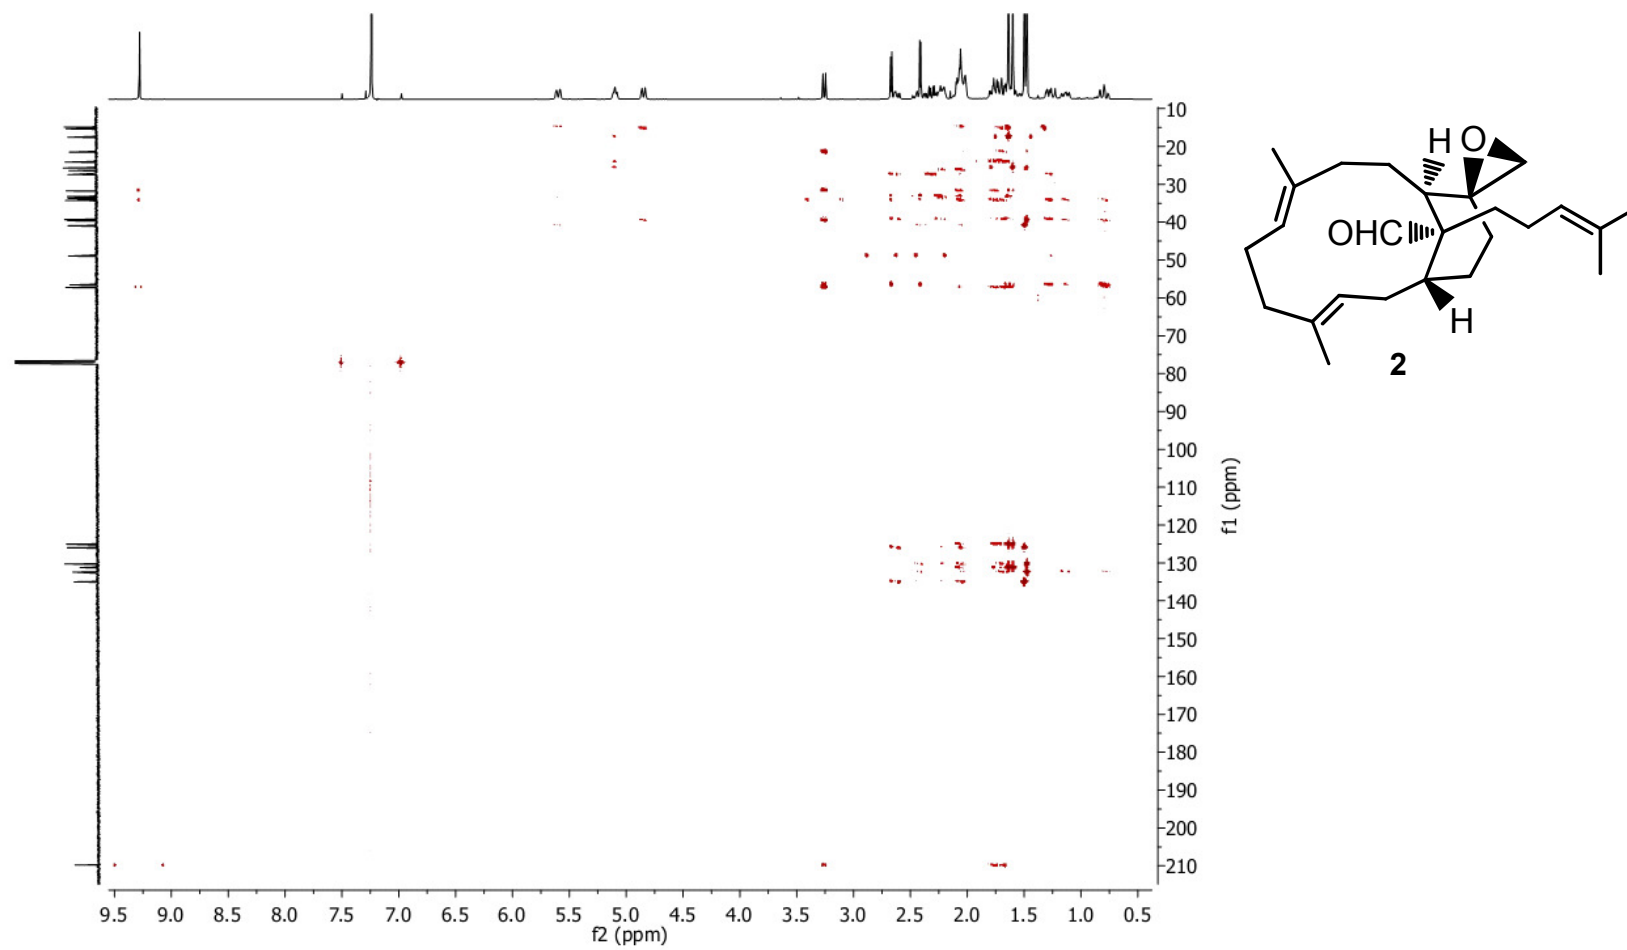



**Figure S10.**  $^{13}\text{C}$  NMR Spectrum (100 MHz) of Emericellene B (**3**) in  $\text{CDCl}_3$

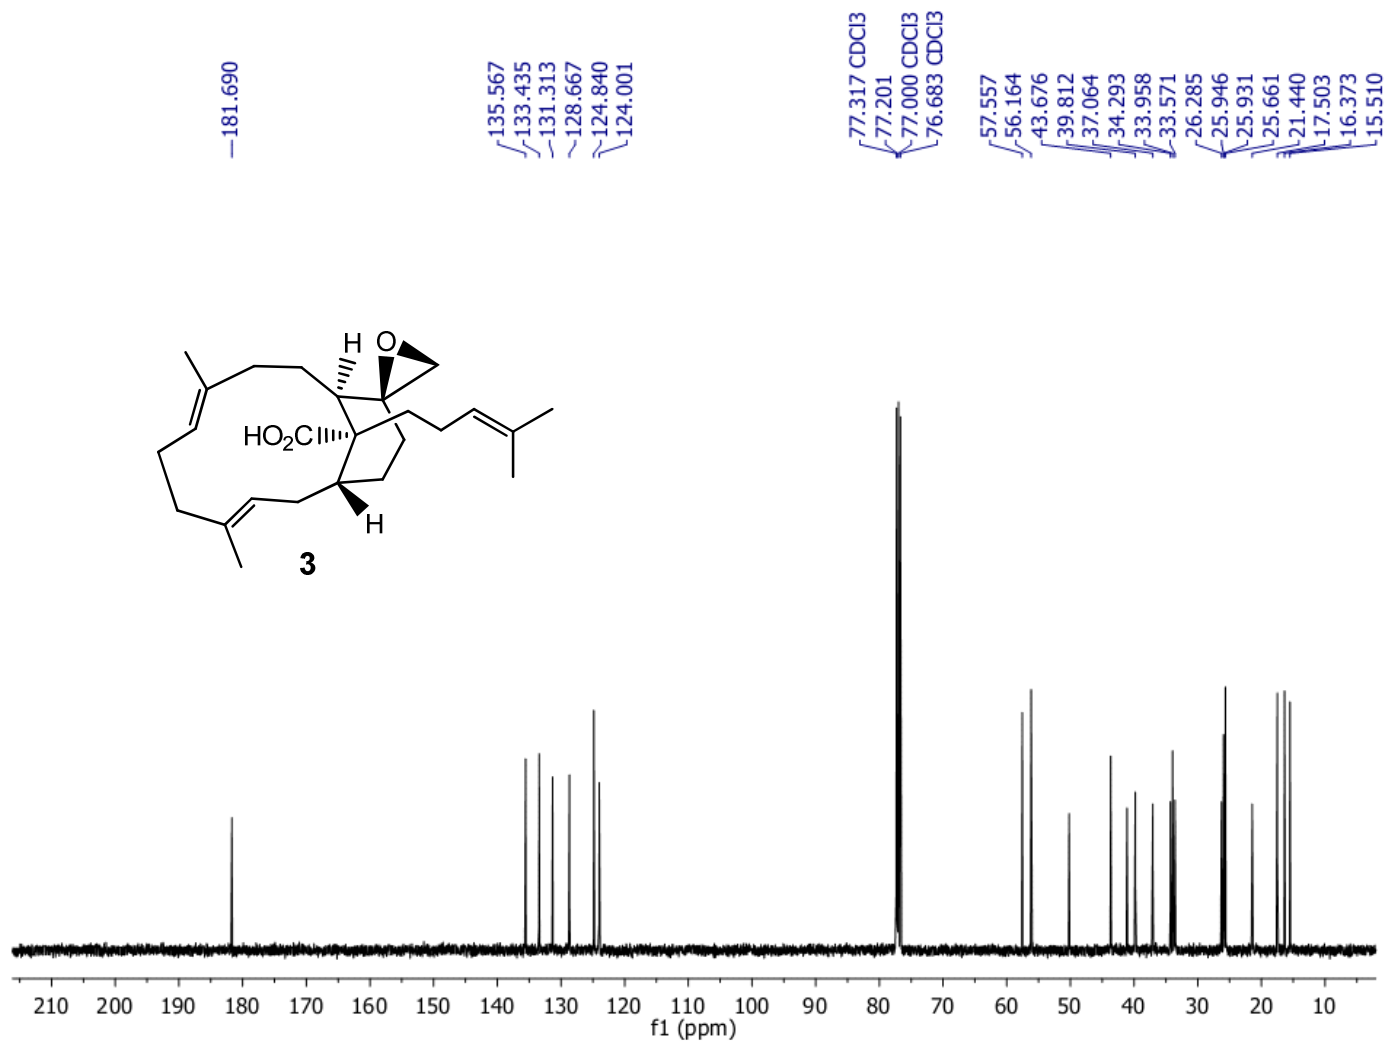

**Figure S11.** HSQC Spectrum (400 MHz) of Emericellene B (**3**) in CDCl<sub>3</sub>

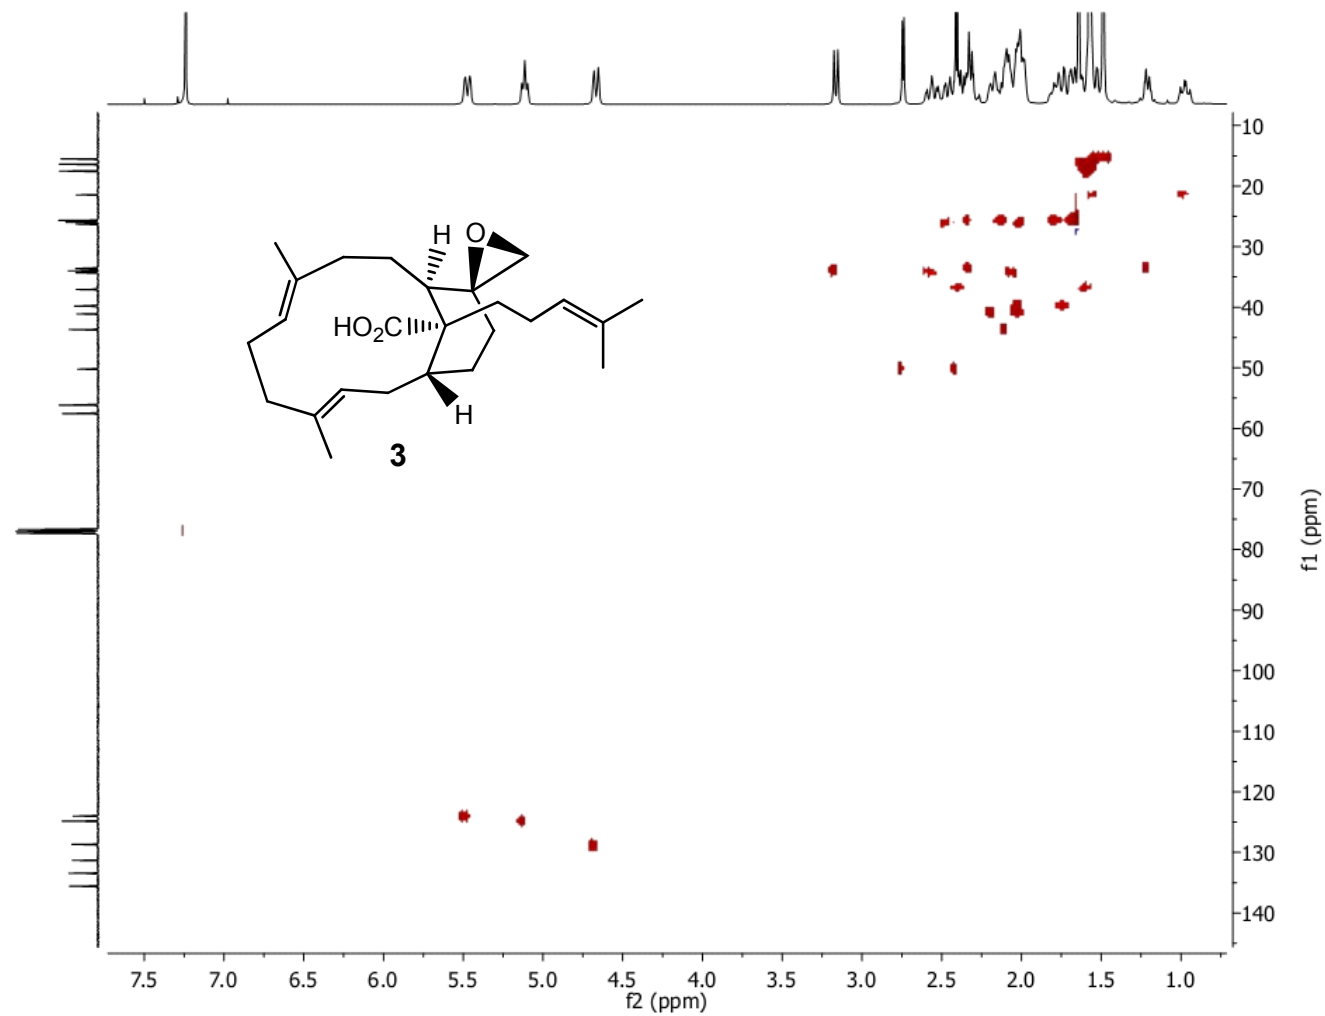

**Figure S12.** HMBC Spectrum (400 MHz) of Emericellene B (**3**) in CDCl<sub>3</sub>

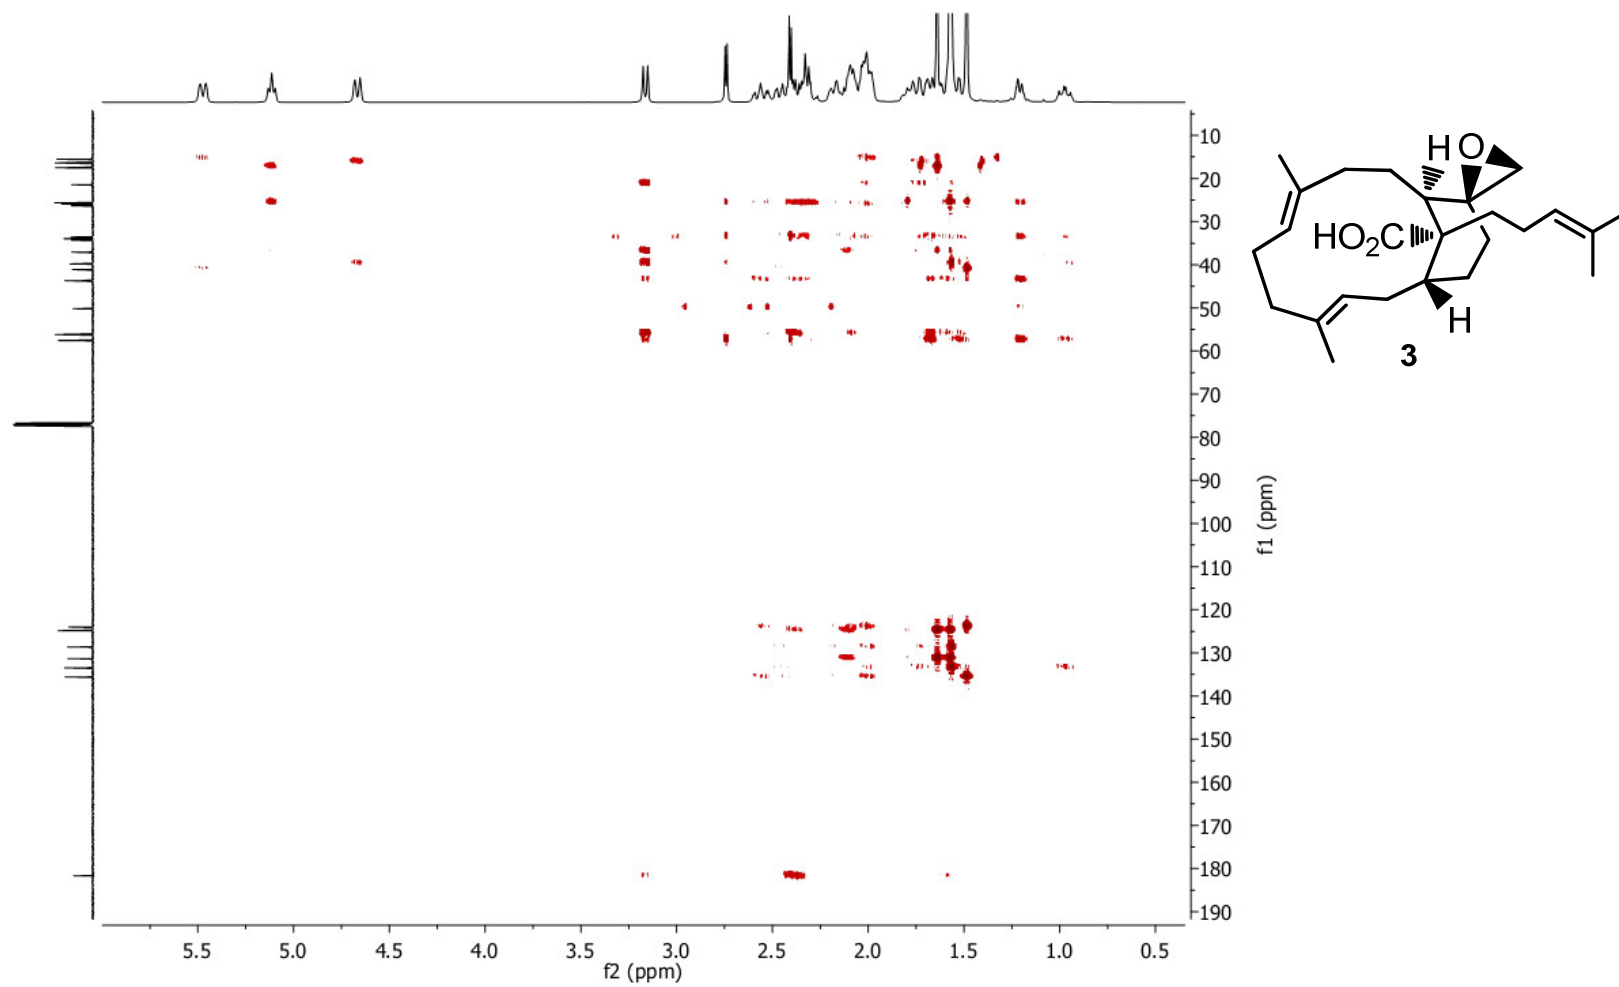

**Figure S13.**  $^1\text{H}$  NMR Spectrum (400 MHz) of Emericellene C (**4**) in  $\text{CDCl}_3$

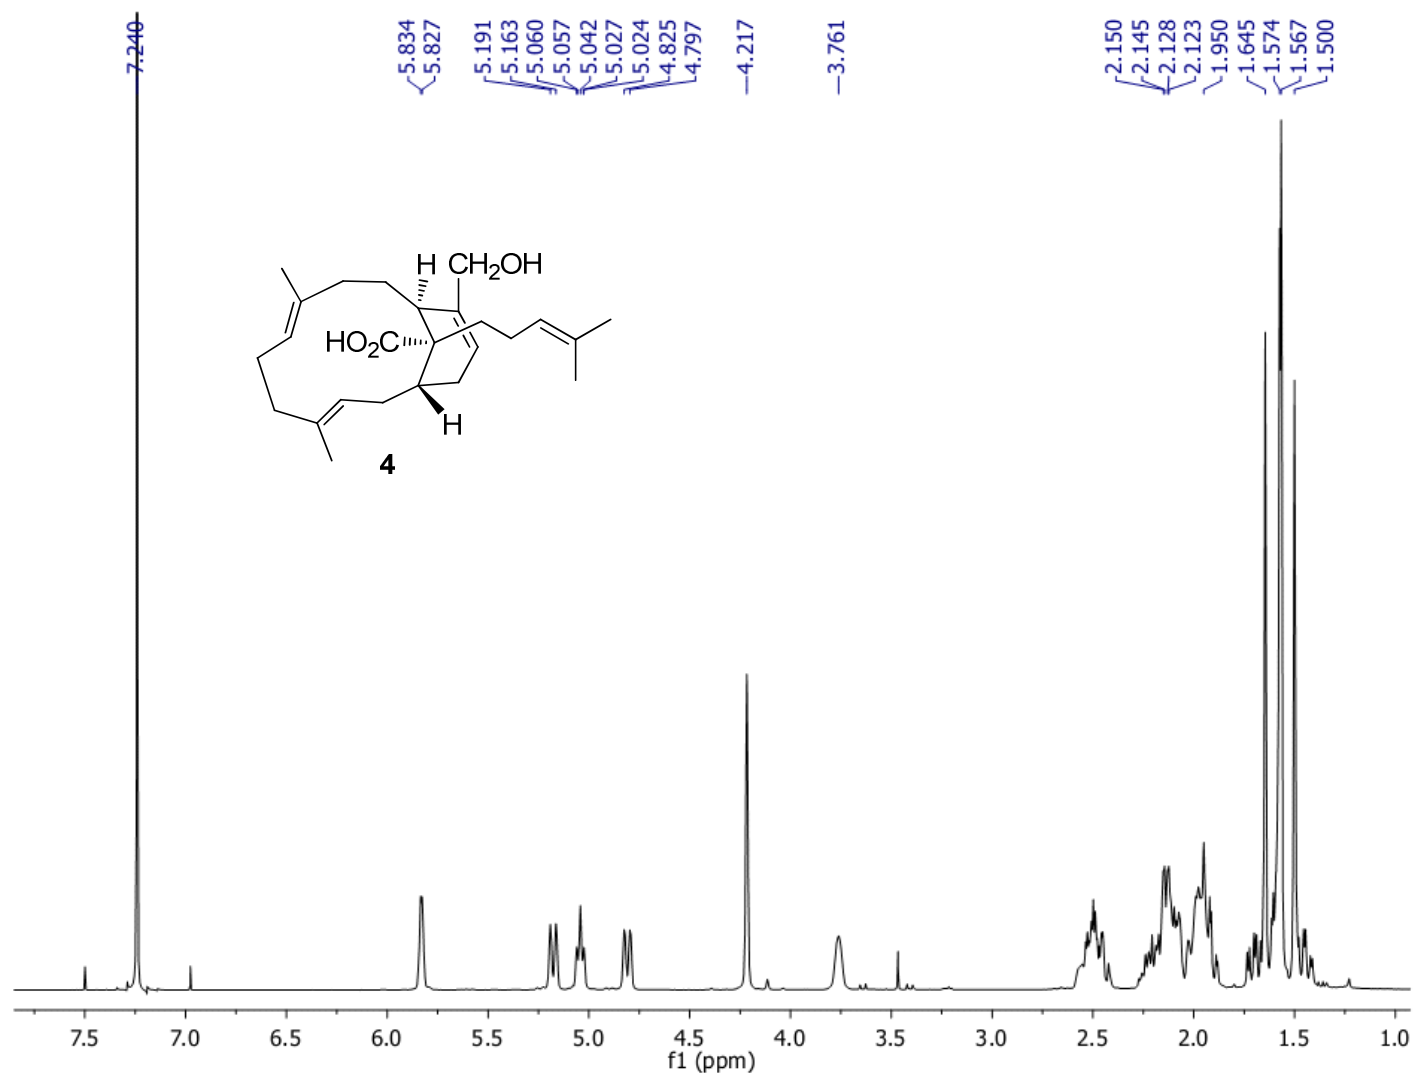

**Figure S14.**  $^{13}\text{C}$  NMR Spectrum (100 MHz) of Emericellene C (**4**) in  $\text{CDCl}_3$

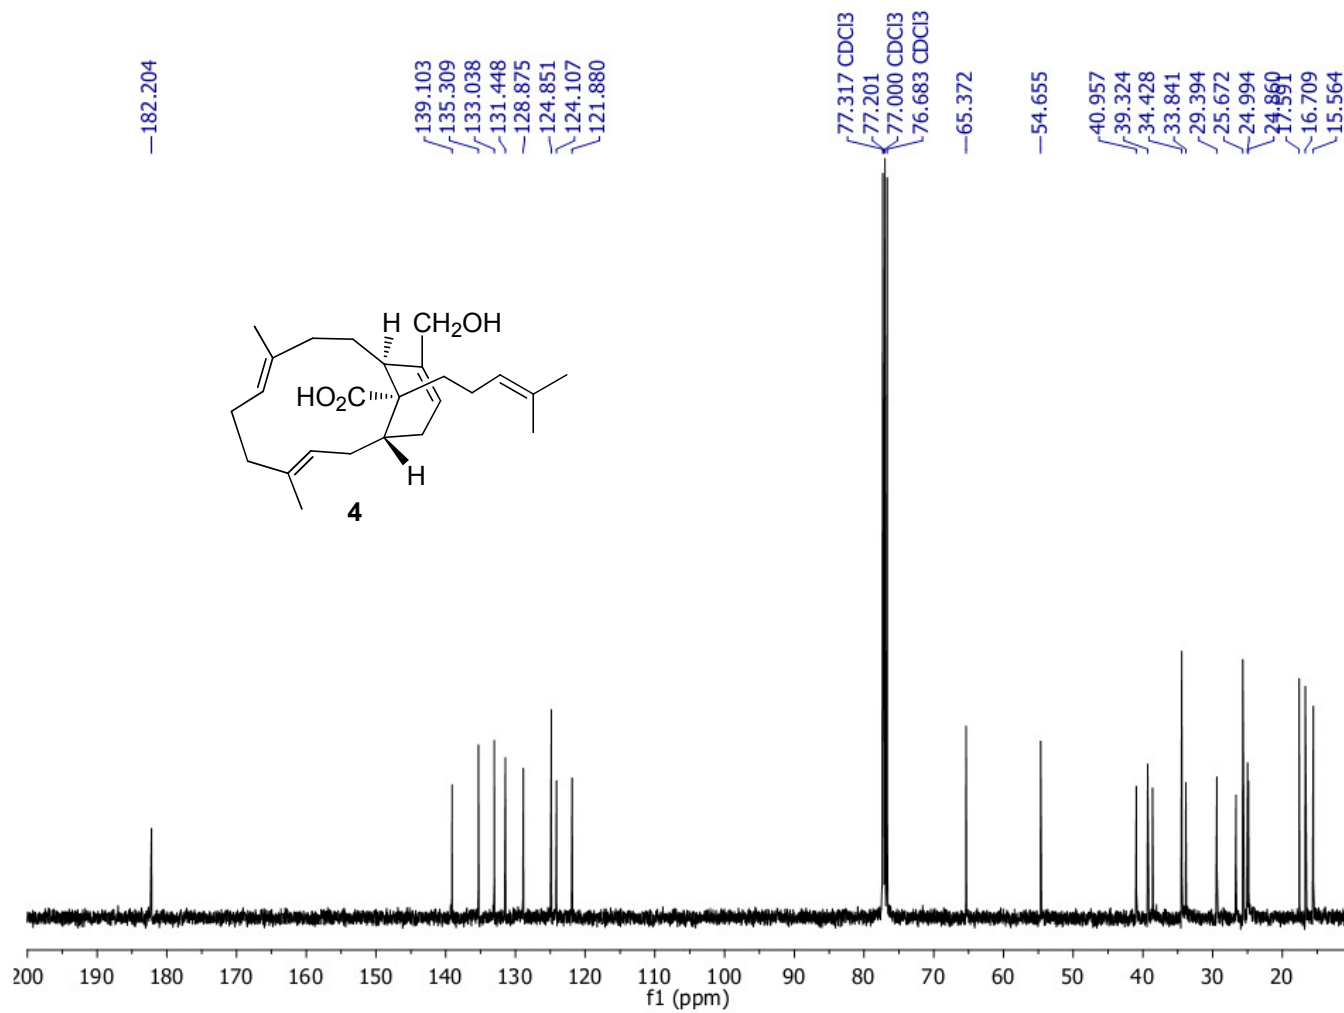



**Figure S15.** HSQC Spectrum (400 MHz) of Emericellene C (**4**) in CDCl<sub>3</sub>

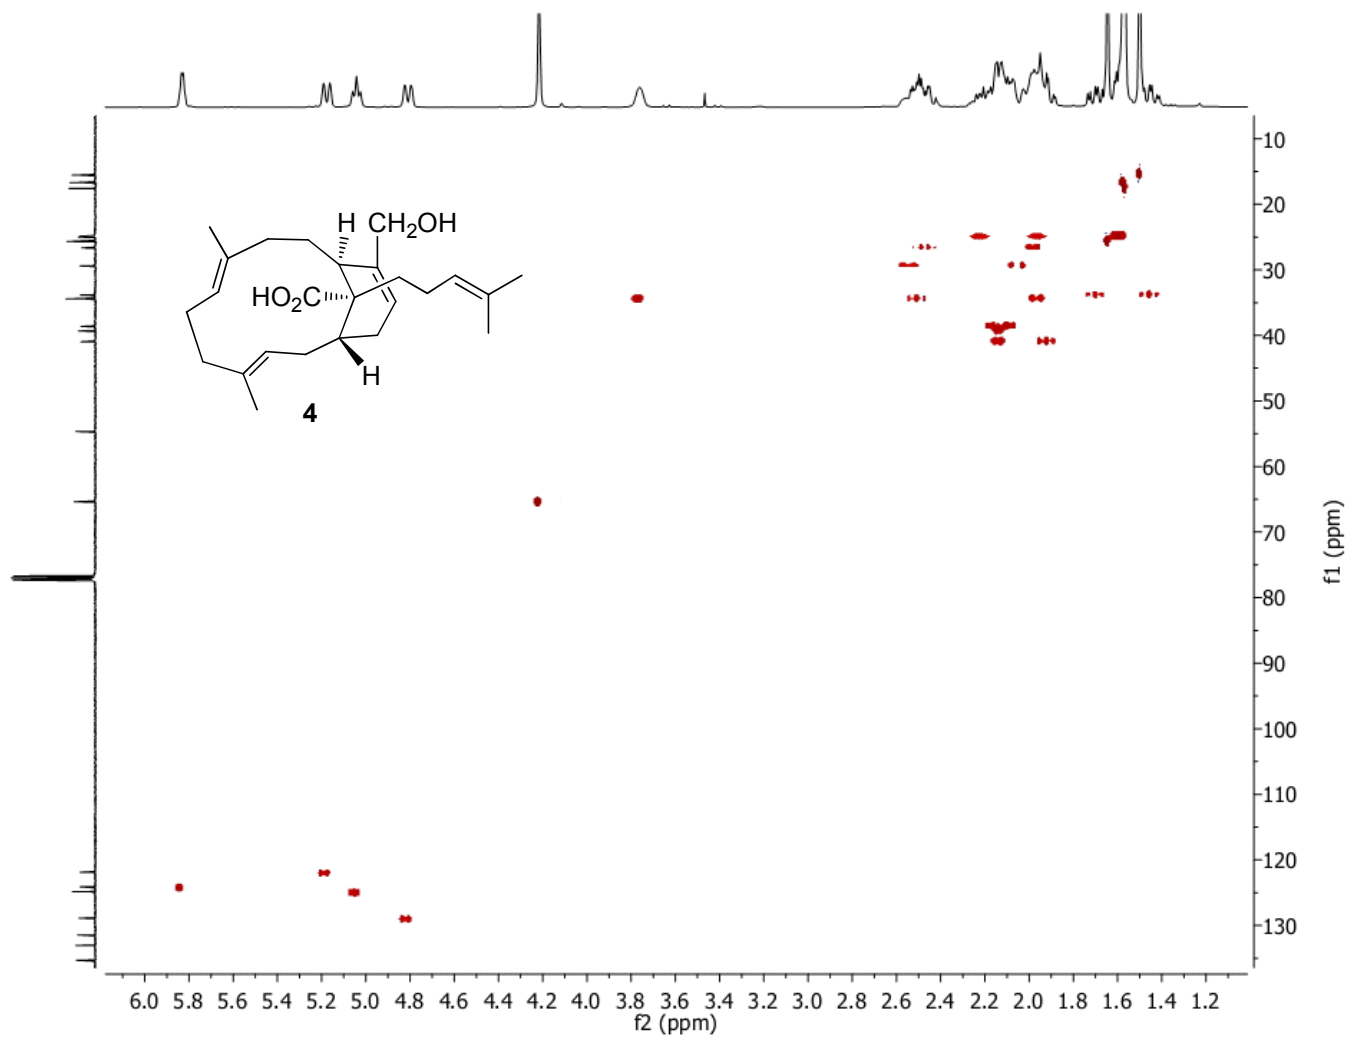

**Figure S16.** HMBC Spectrum (400 MHz) of Emericellene C (**4**) in CDCl<sub>3</sub>

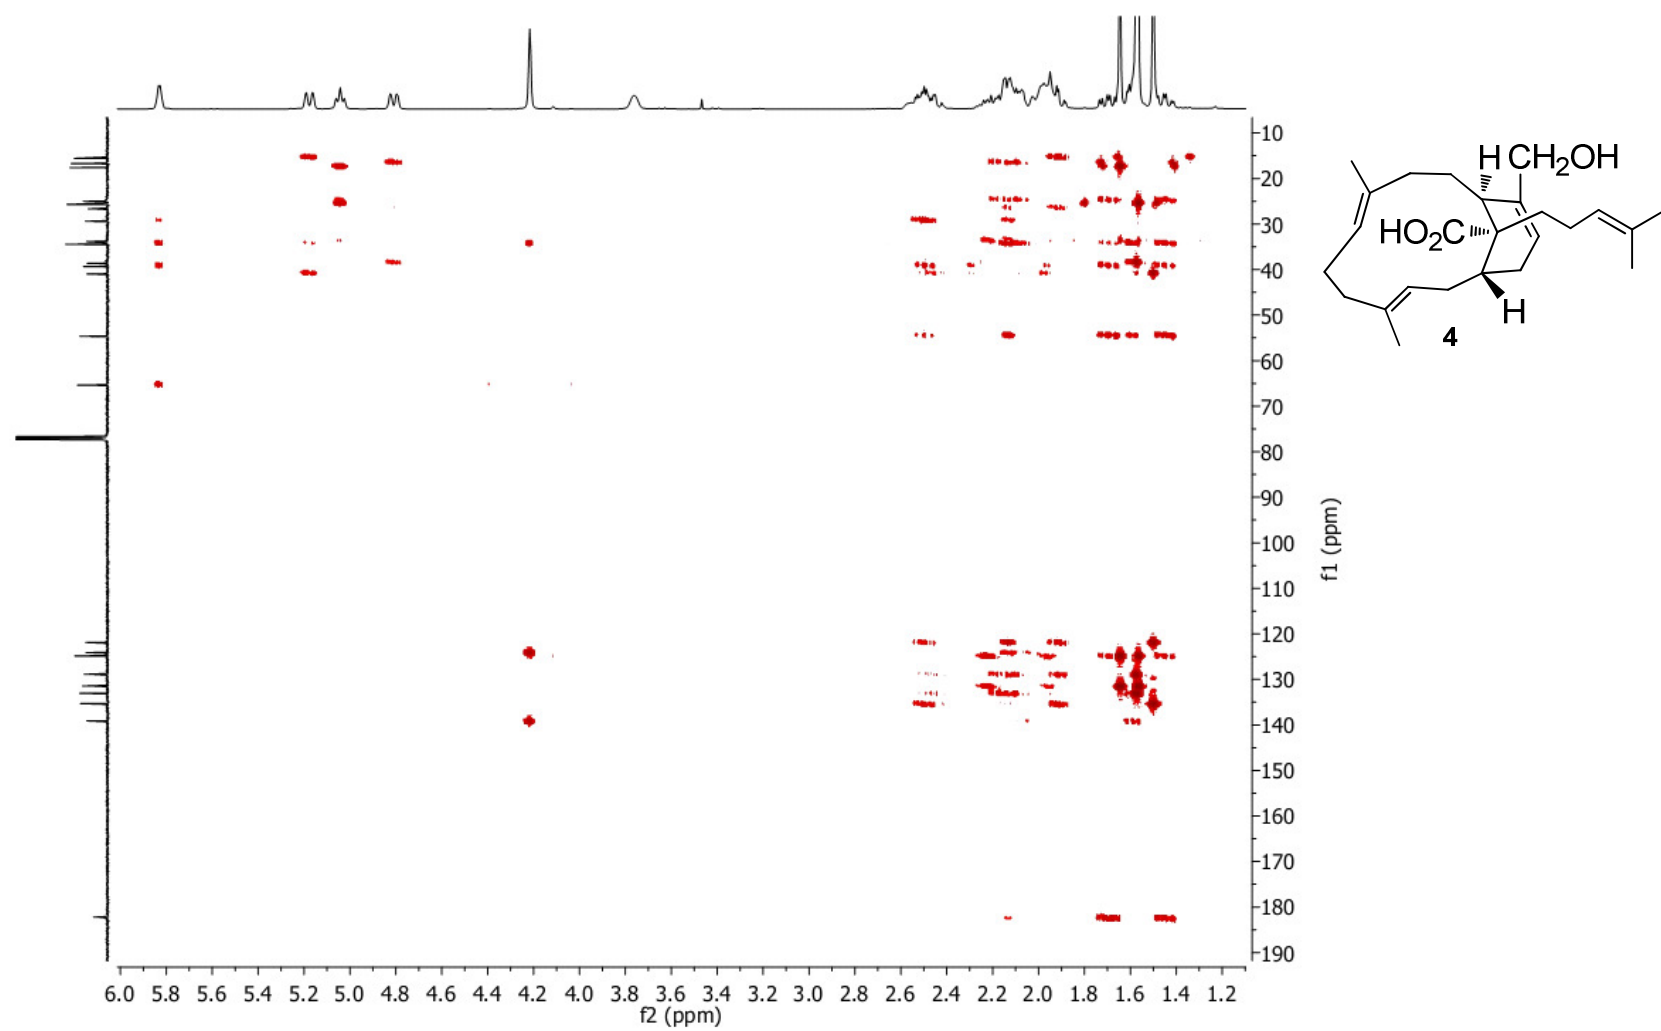

**Figure S17.**  $^1\text{H}$  NMR Spectrum (400 MHz) of Emericellene D (**5**) in  $\text{CDCl}_3$

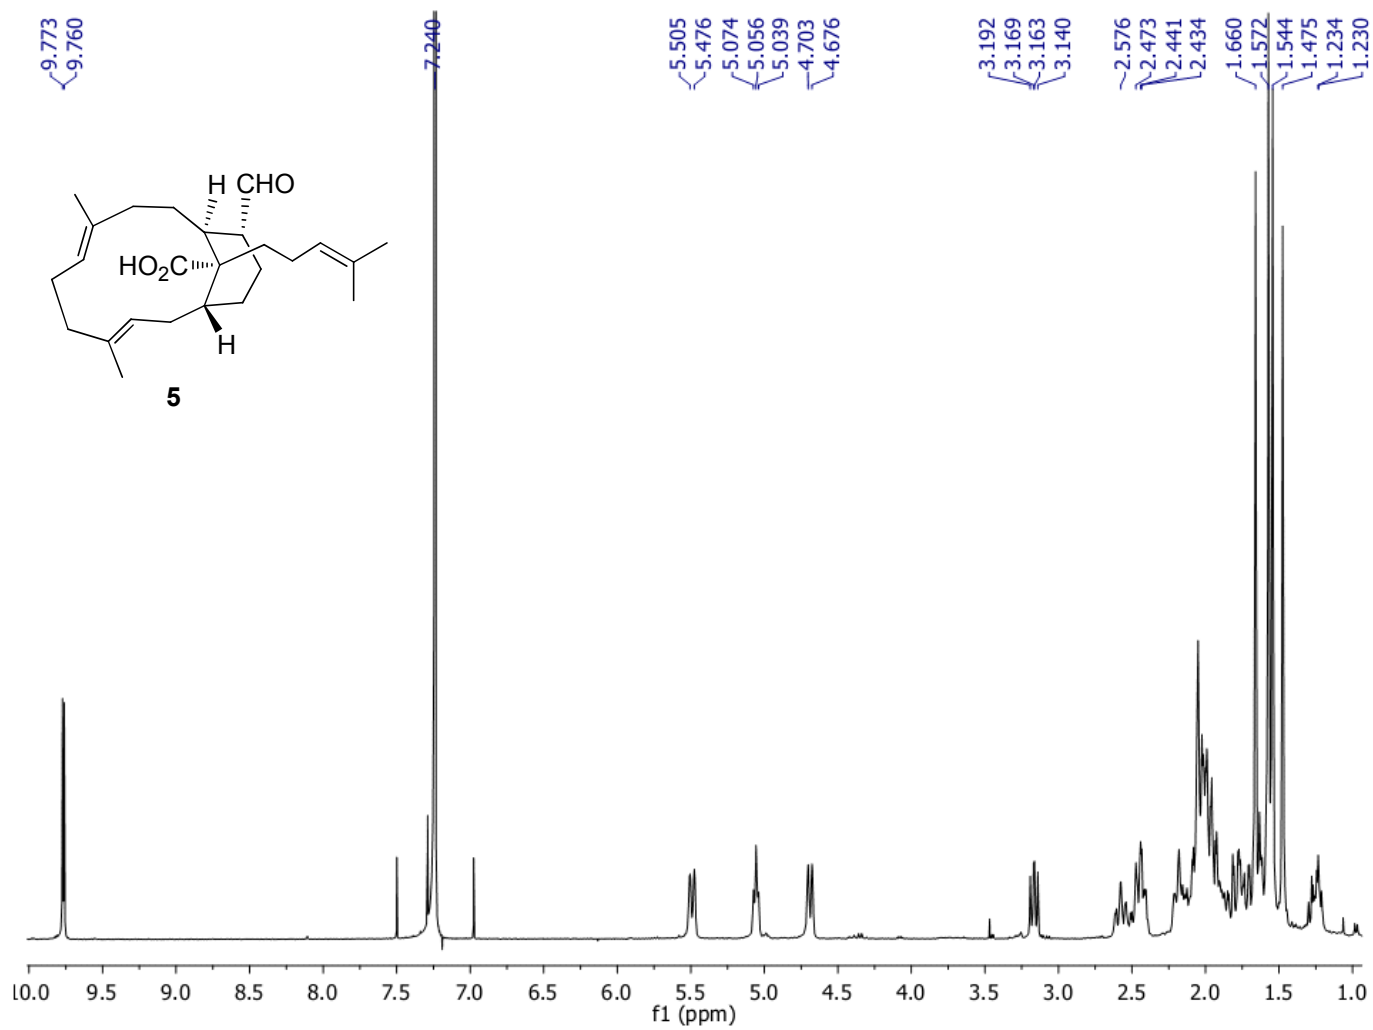

**Figure S18.**  $^{13}\text{C}$  NMR Spectrum (100 MHz) of Emericellene D (**5**) in  $\text{CDCl}_3$

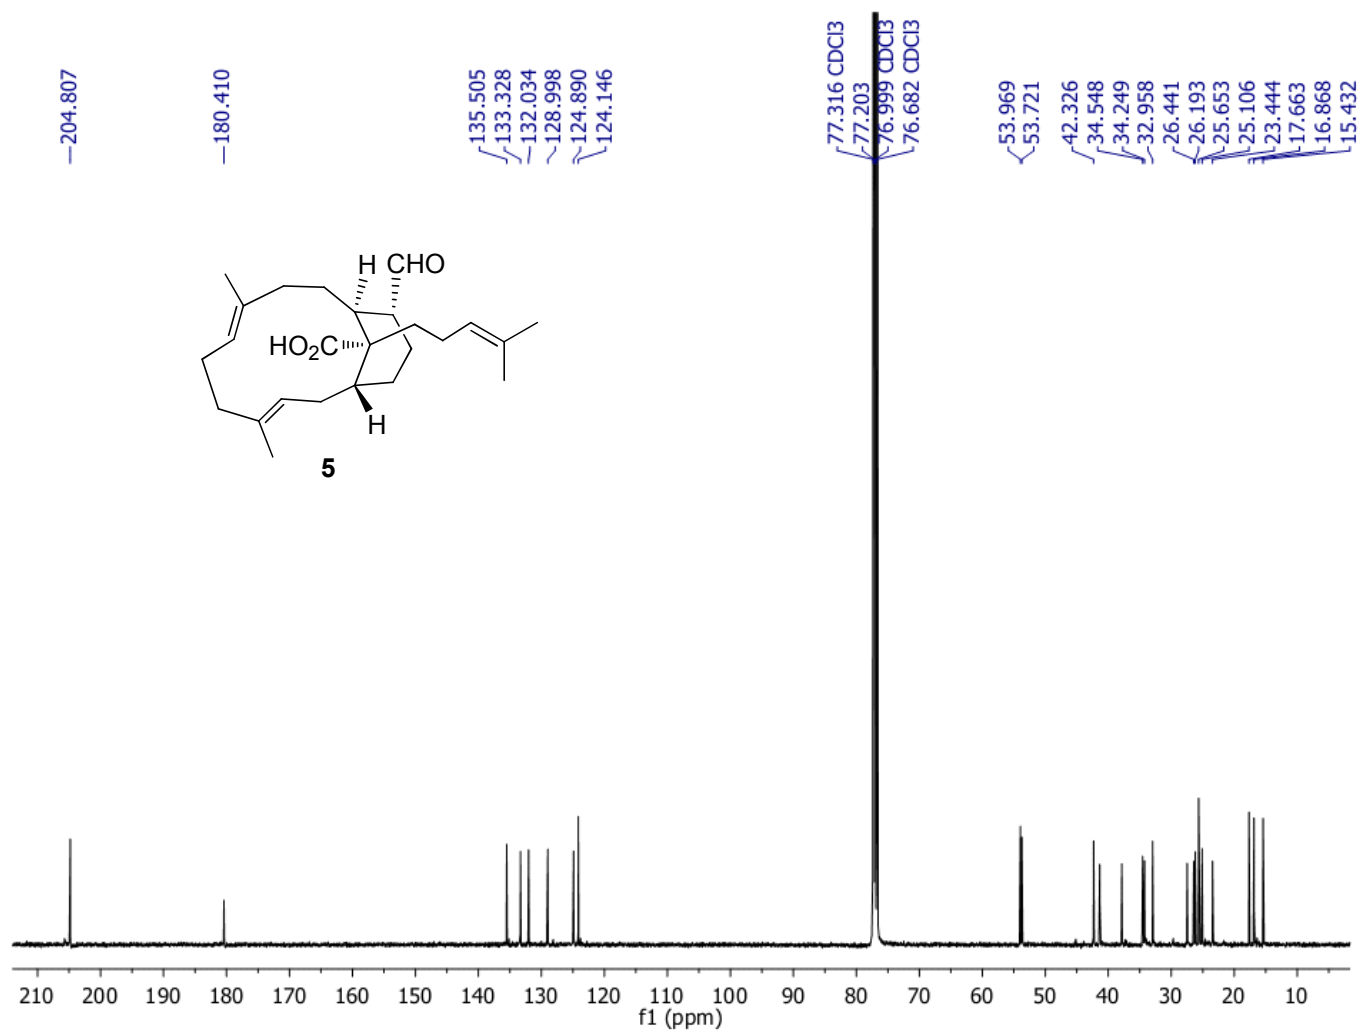

**Figure S19.** HSQC Spectrum (400 MHz) of Emericellene D (**5**) in CDCl<sub>3</sub>

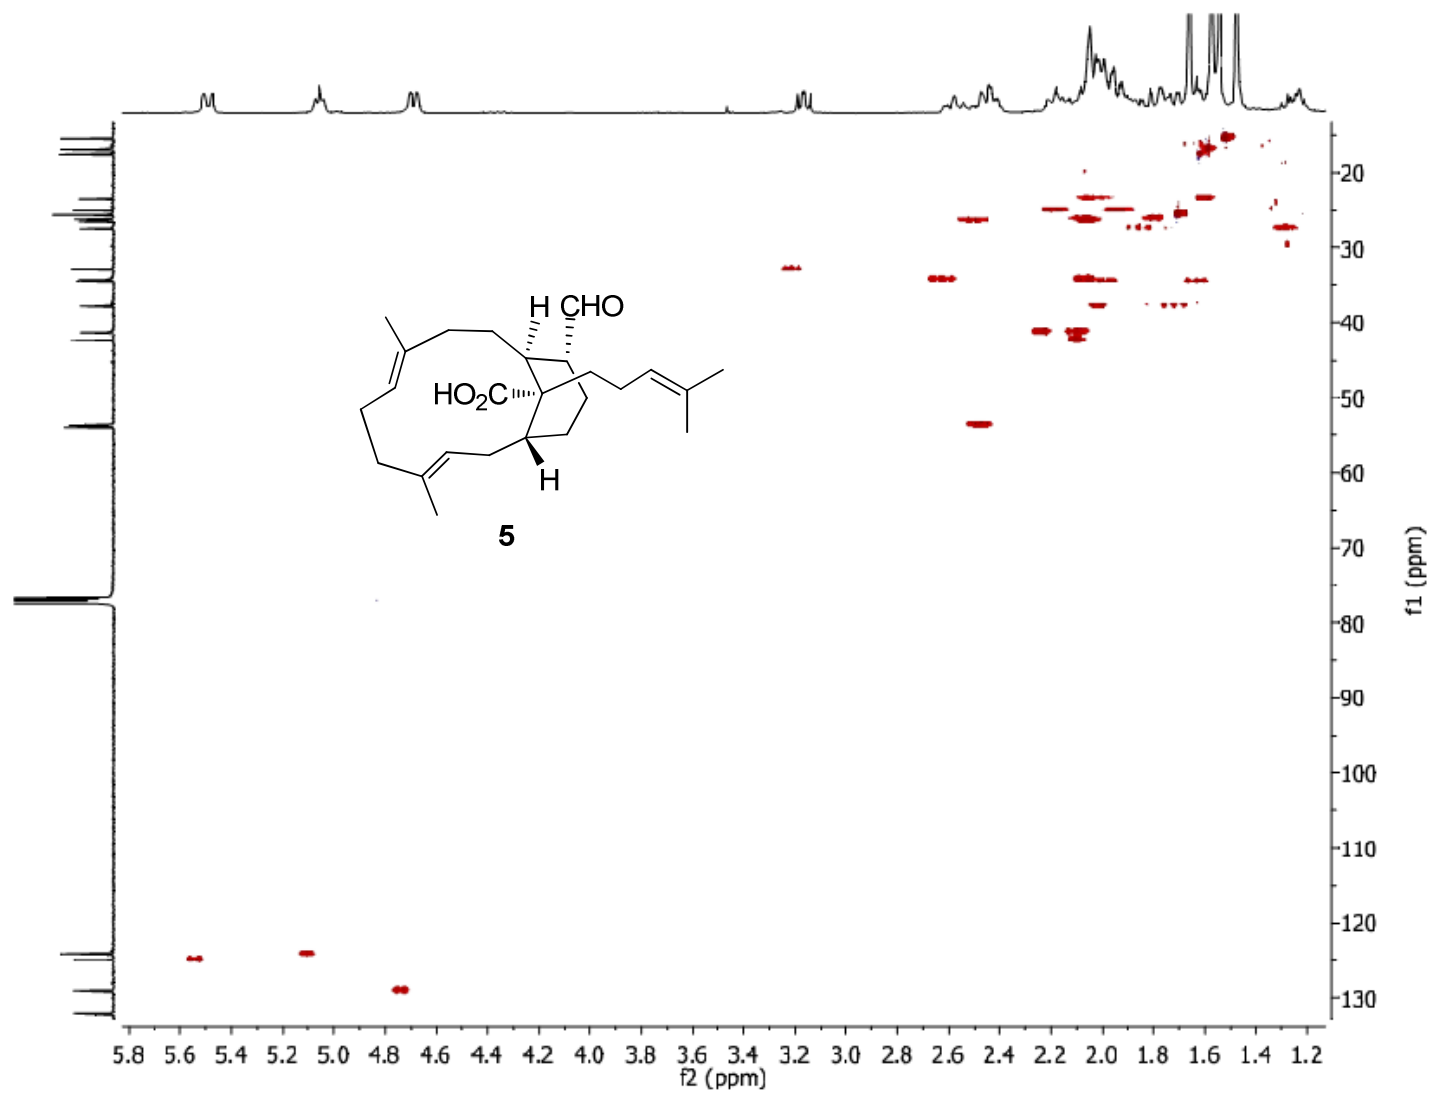

**Figure S20.** HMBC Spectrum (400 MHz) of Emericellene D (**5**) in CDCl<sub>3</sub>

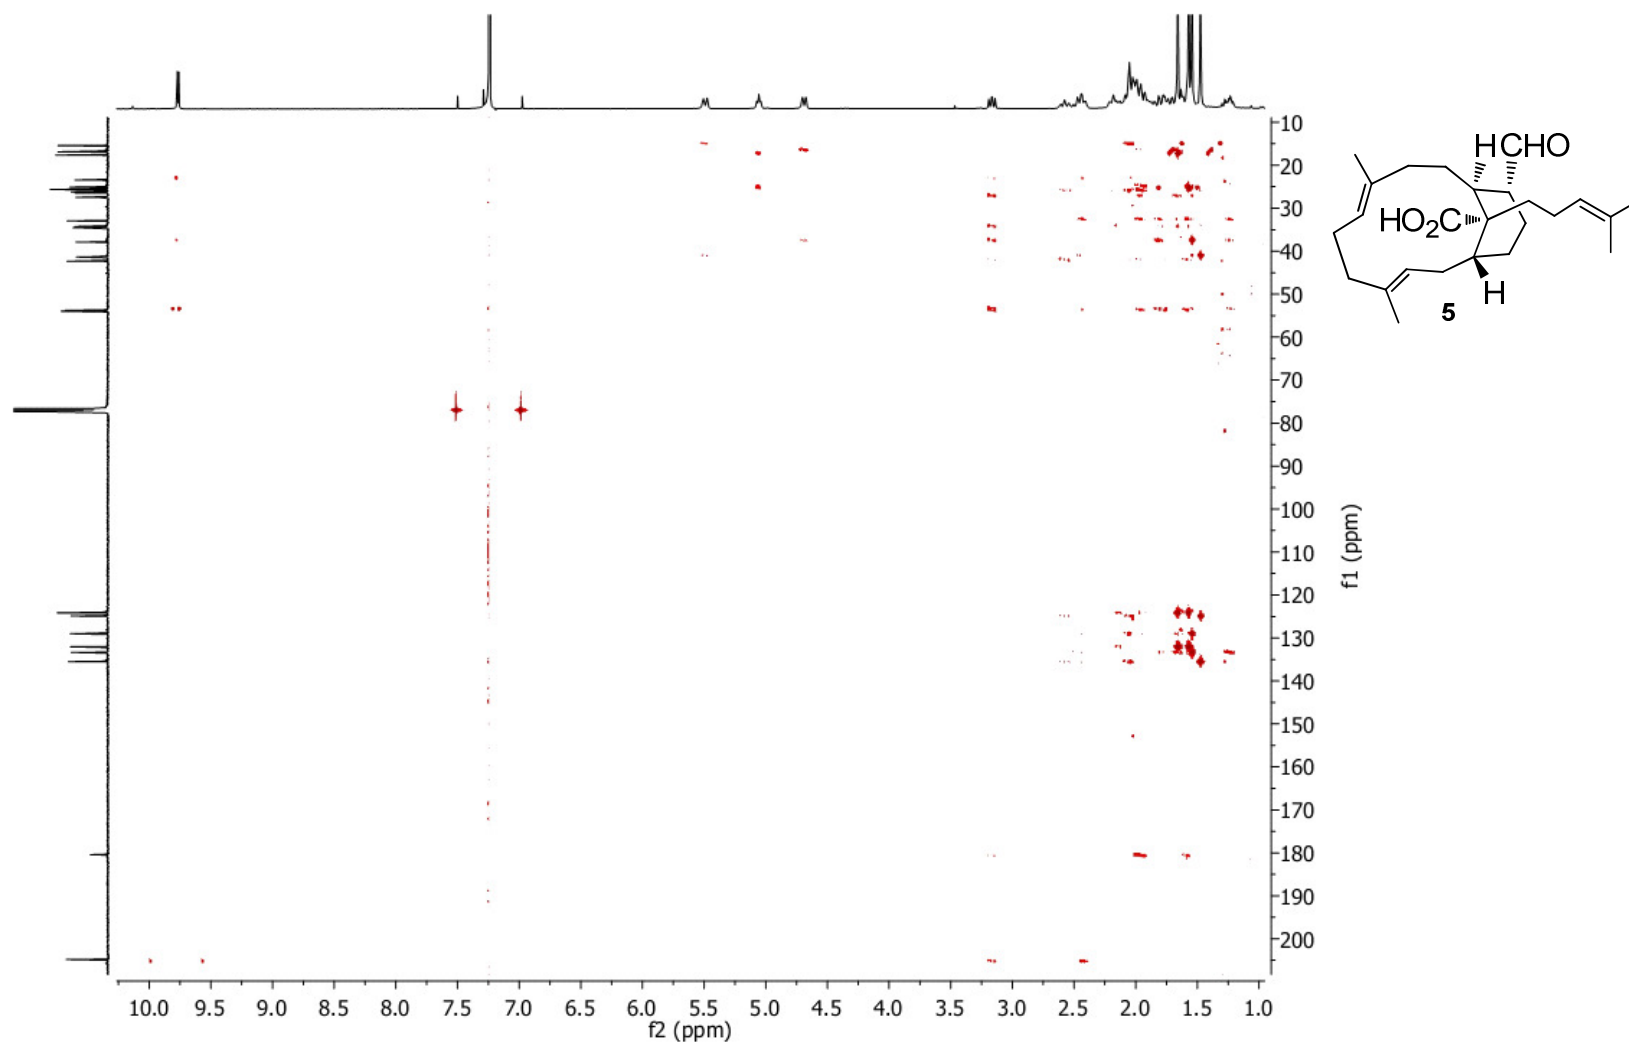

Figure S21.  $^1\text{H}$  NMR Spectrum (400 MHz) of Emericellene E (**6**) in  $\text{CDCl}_3$

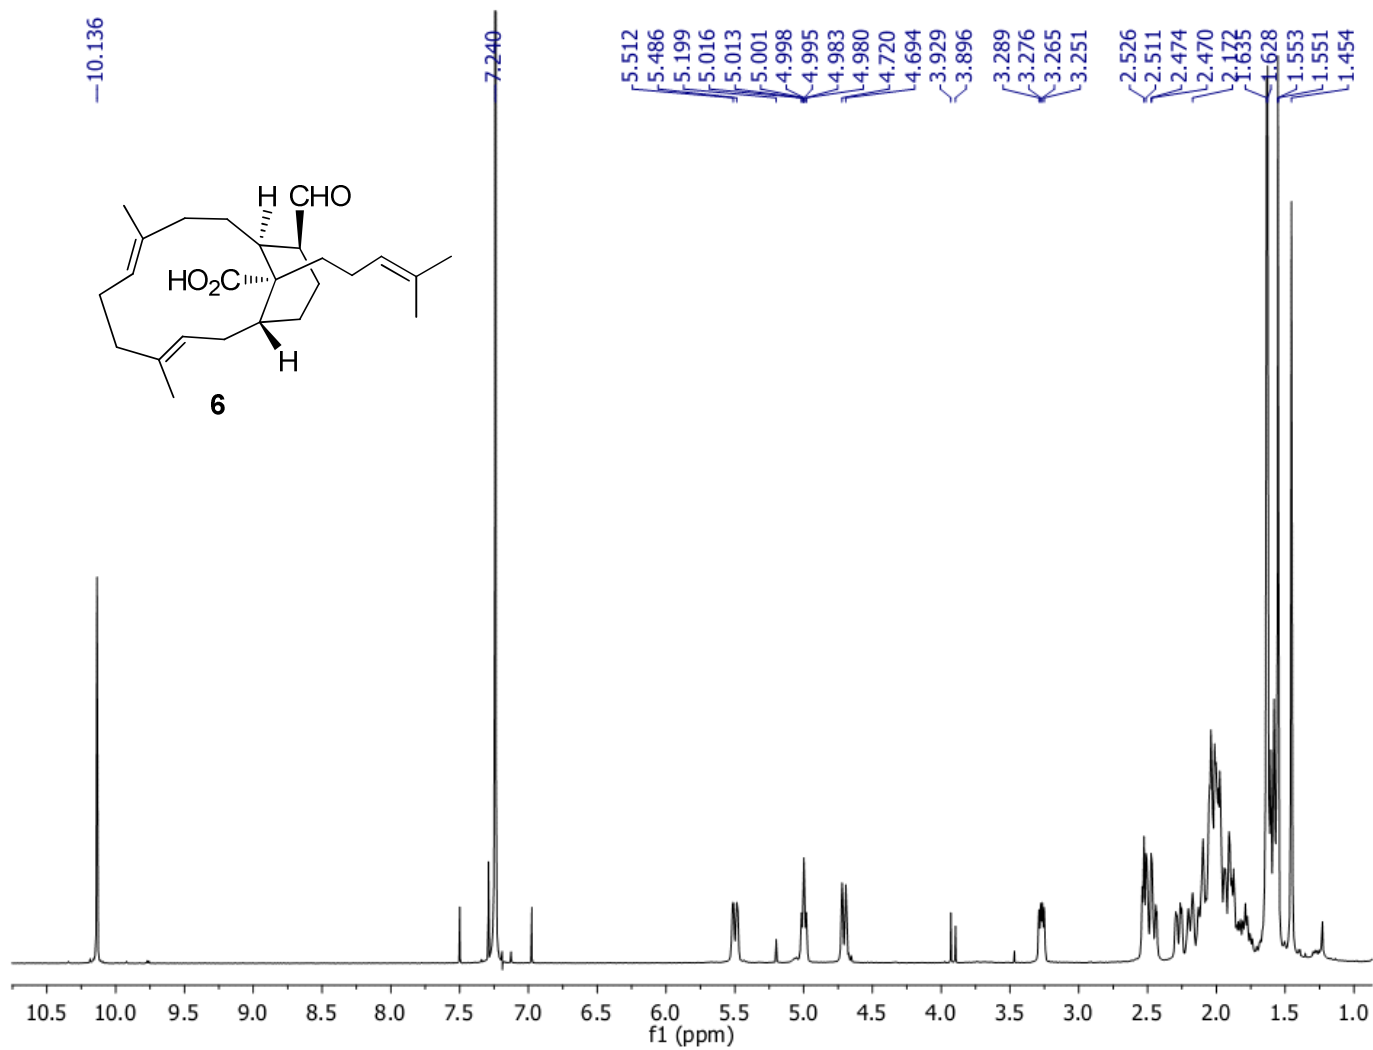

Figure S22.  $^{13}\text{C}$  NMR Spectrum (100 MHz) of Emericellene E (**6**) in  $\text{CDCl}_3$

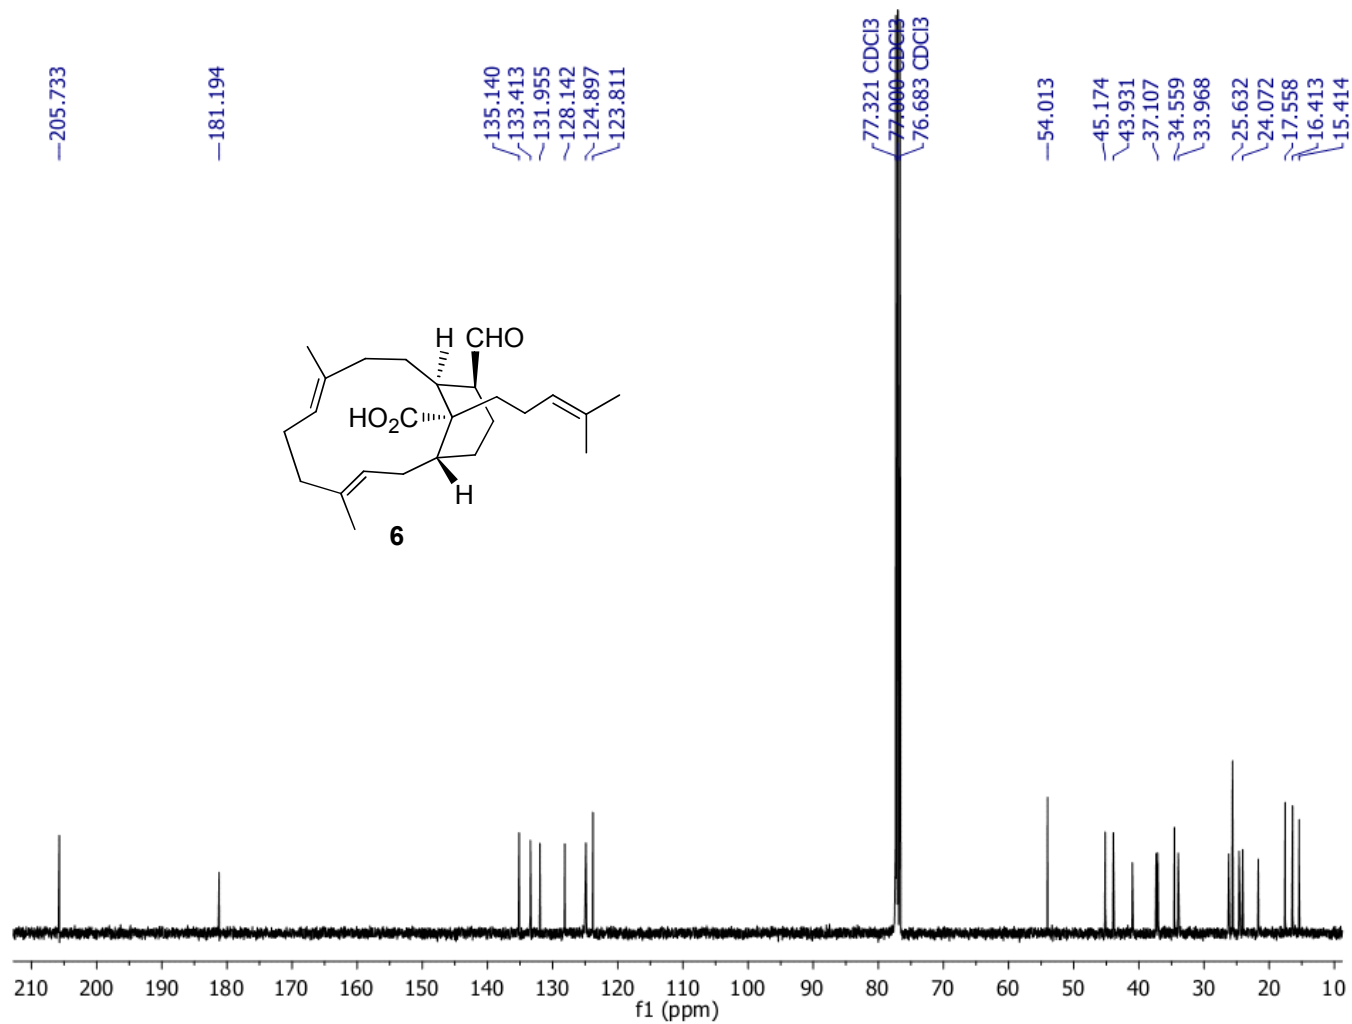



Figure S23. HSQC Spectrum (400 MHz) of Emericellene E (6) in CDCl<sub>3</sub>

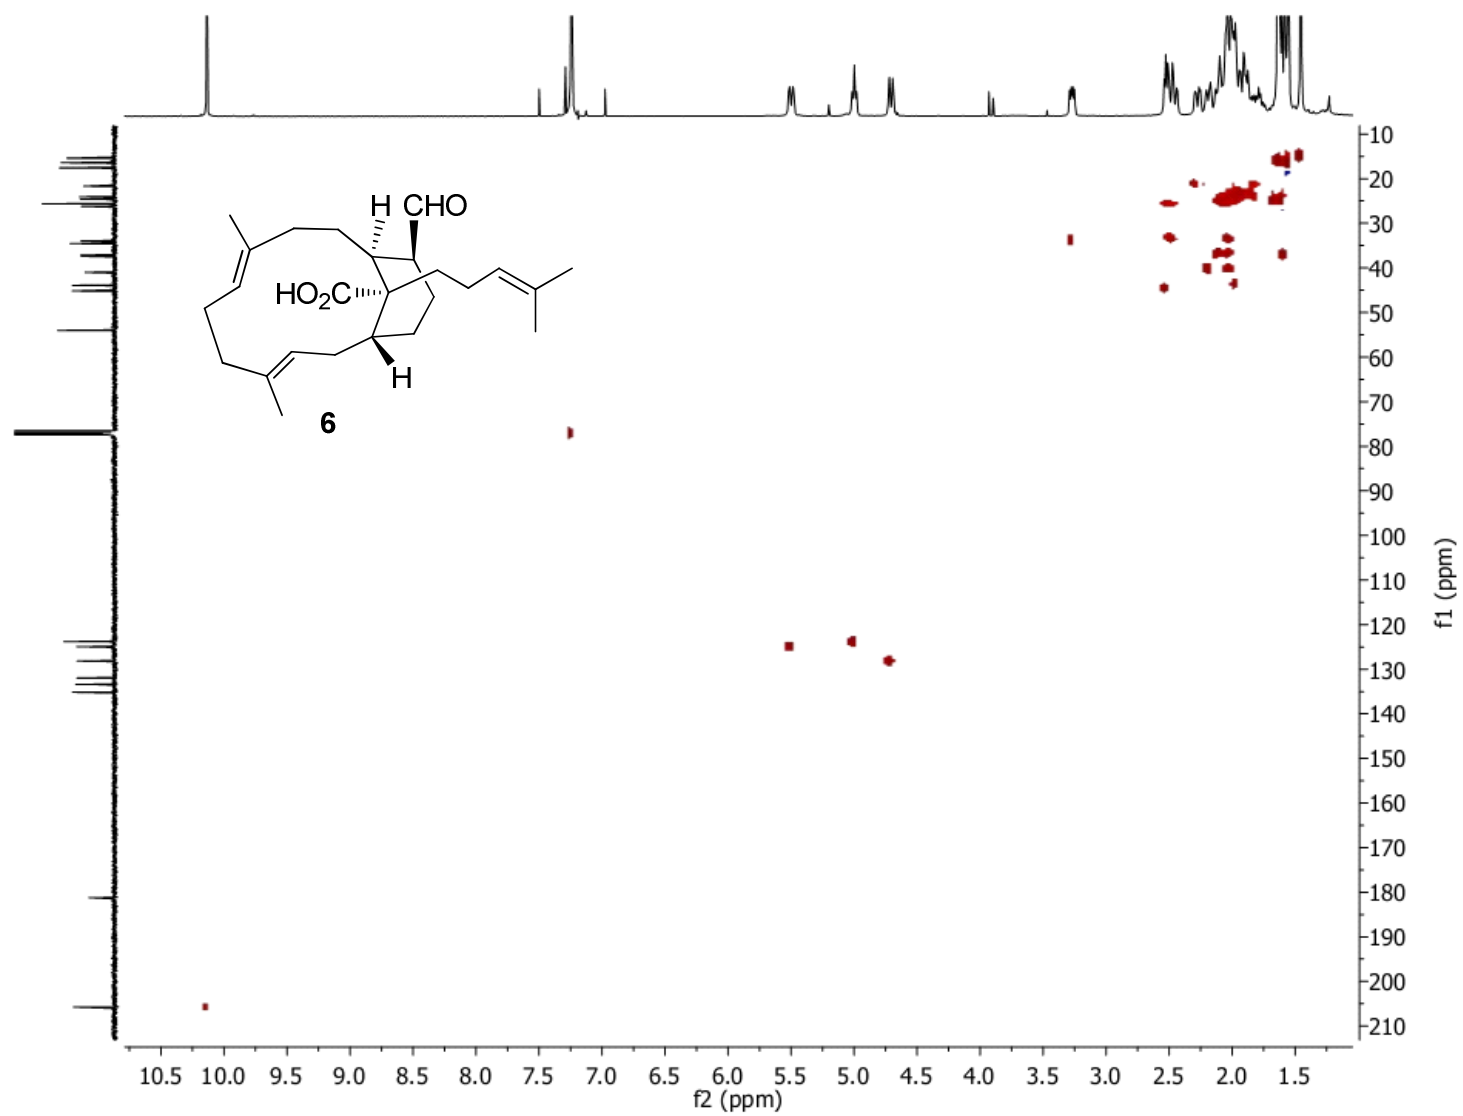

Figure S24. HMBC Spectrum (400 MHz) of Emericellene E (6) in CDCl<sub>3</sub>

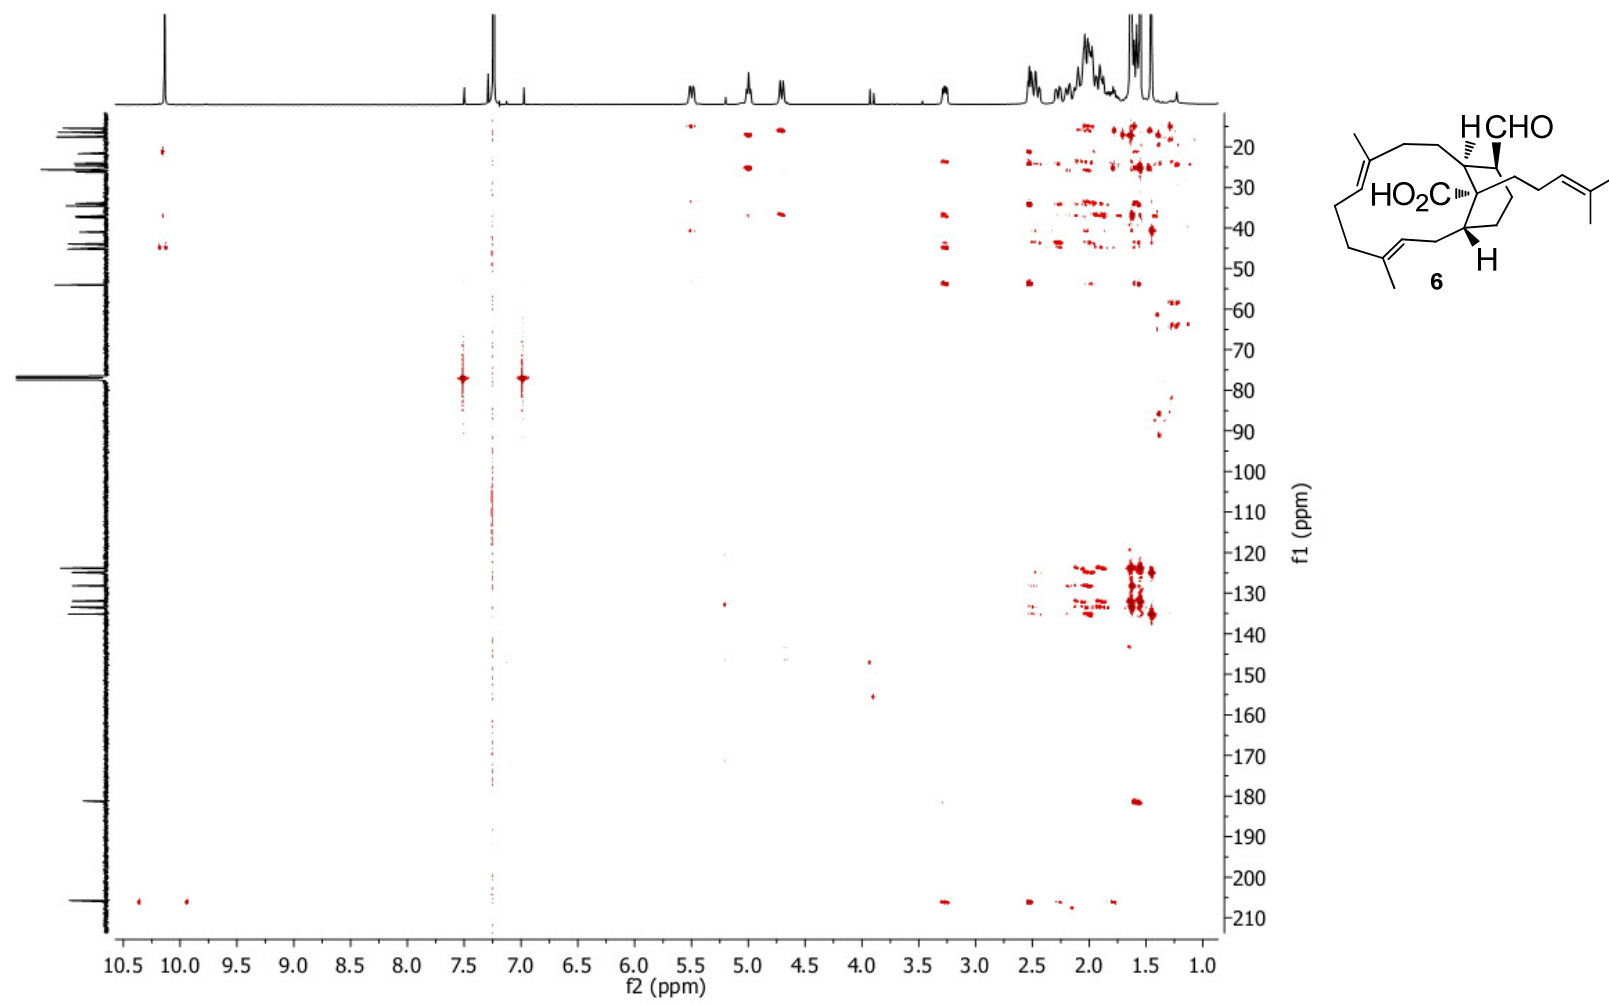

Figure S25. Significant HMBC Correlations of 3-6

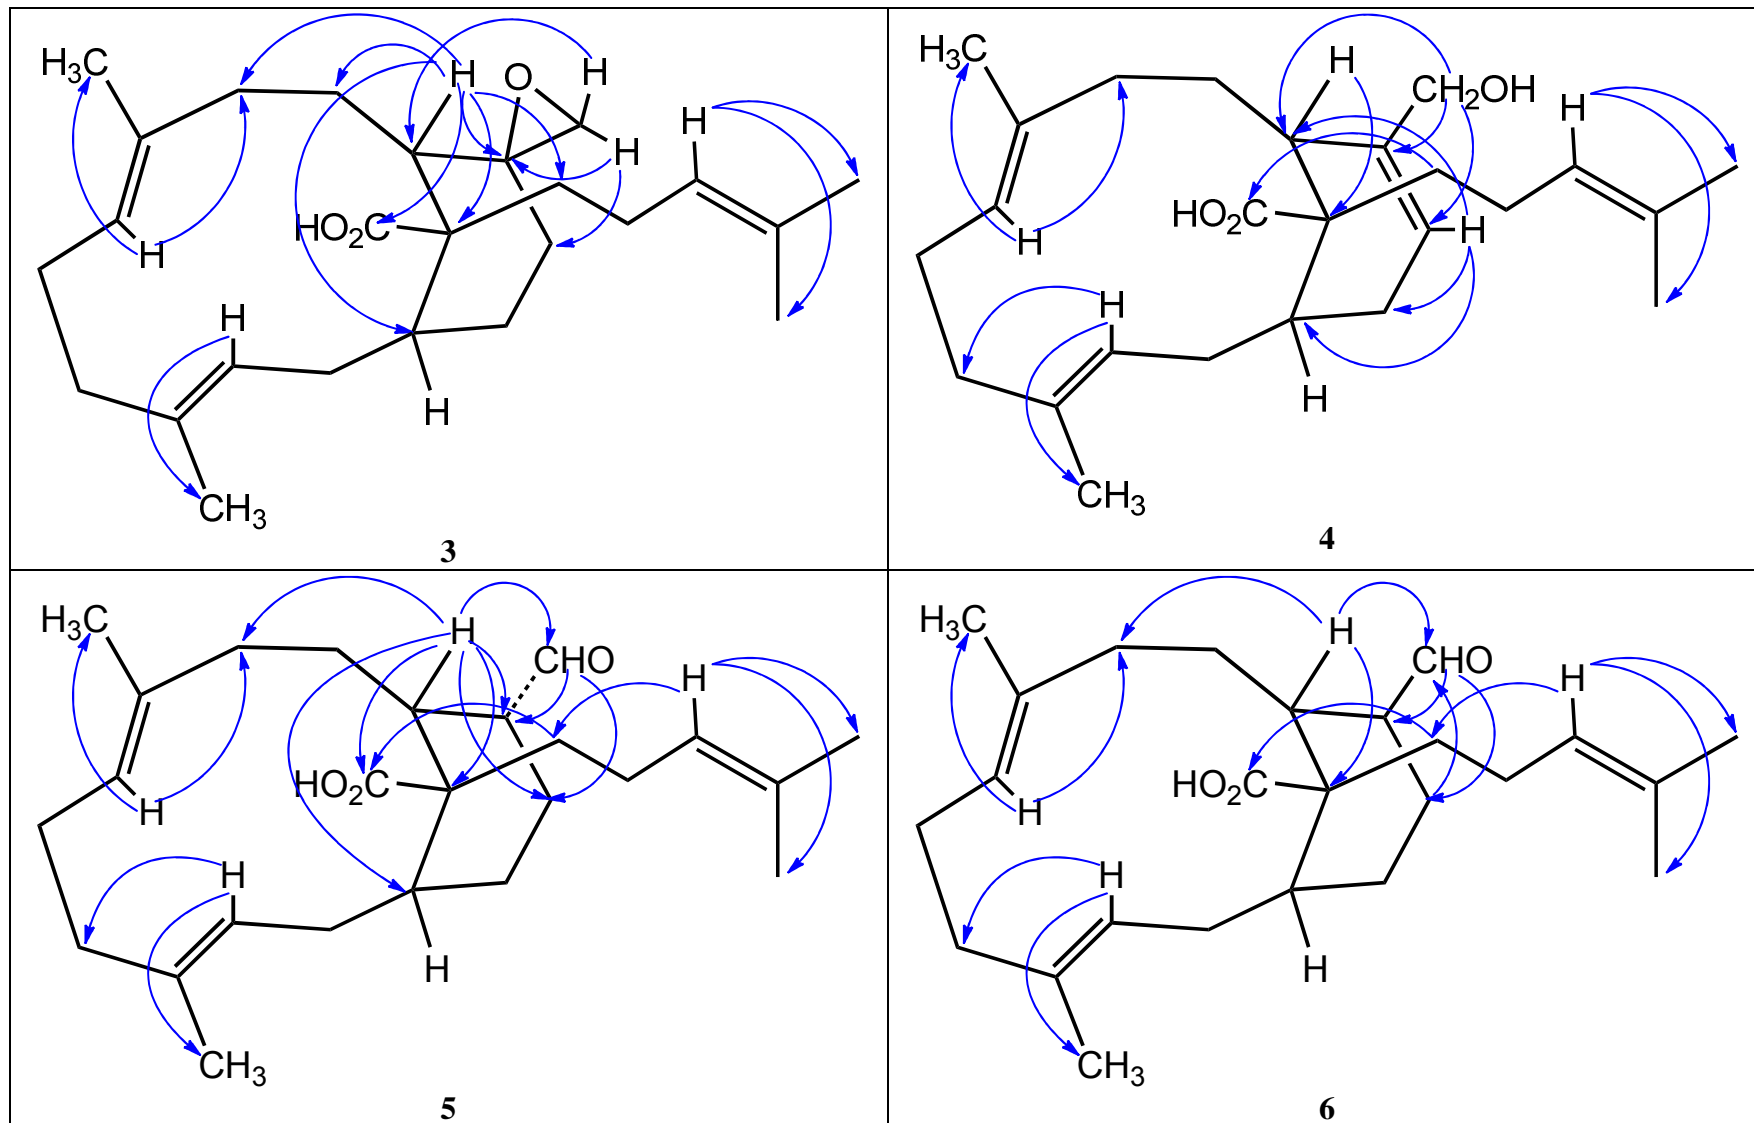

Figure S26. Key NOE Correlations of 3-6

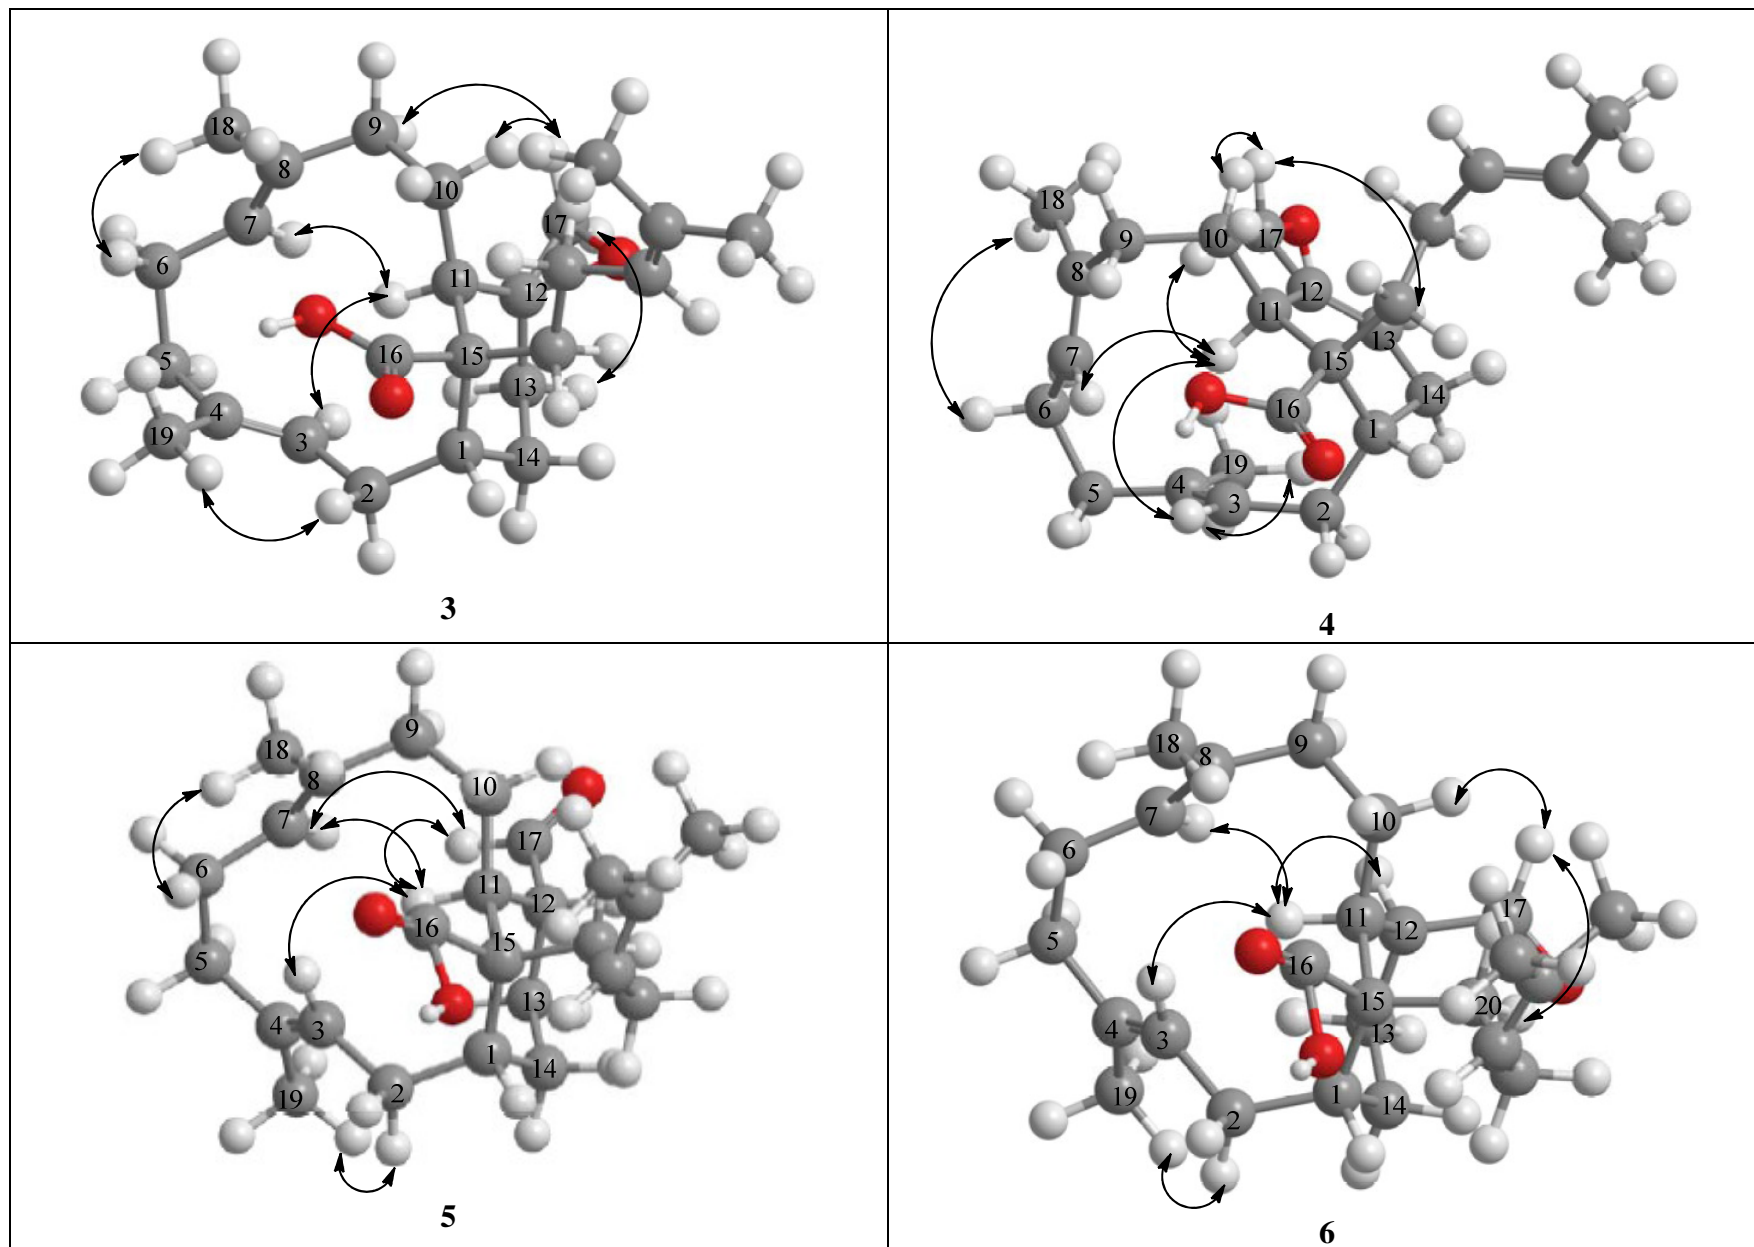

**Figure S27.** Probable Biosynthetic Conversion of Emericellene B (3) to Emericellenes C-E (4-6)

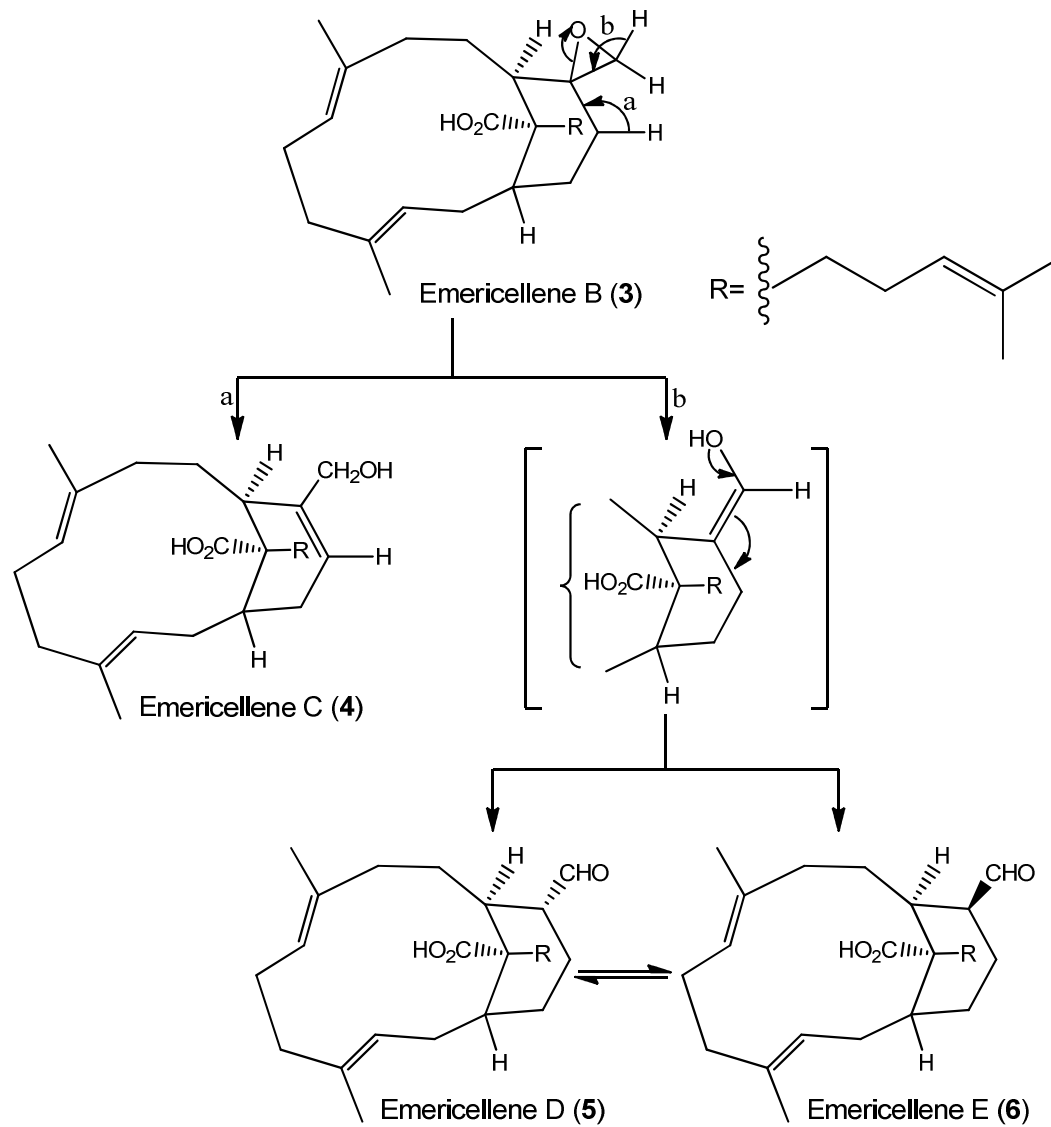

**Figure S28.** Results of Maximum Likelihood Analysis of ITSrDNA Data Revealing Strongly Supported Placement of AST0036 in *Emericella*. Values above Branches Indicate Relevant Maximum Likelihood Bootstrap Support >70%

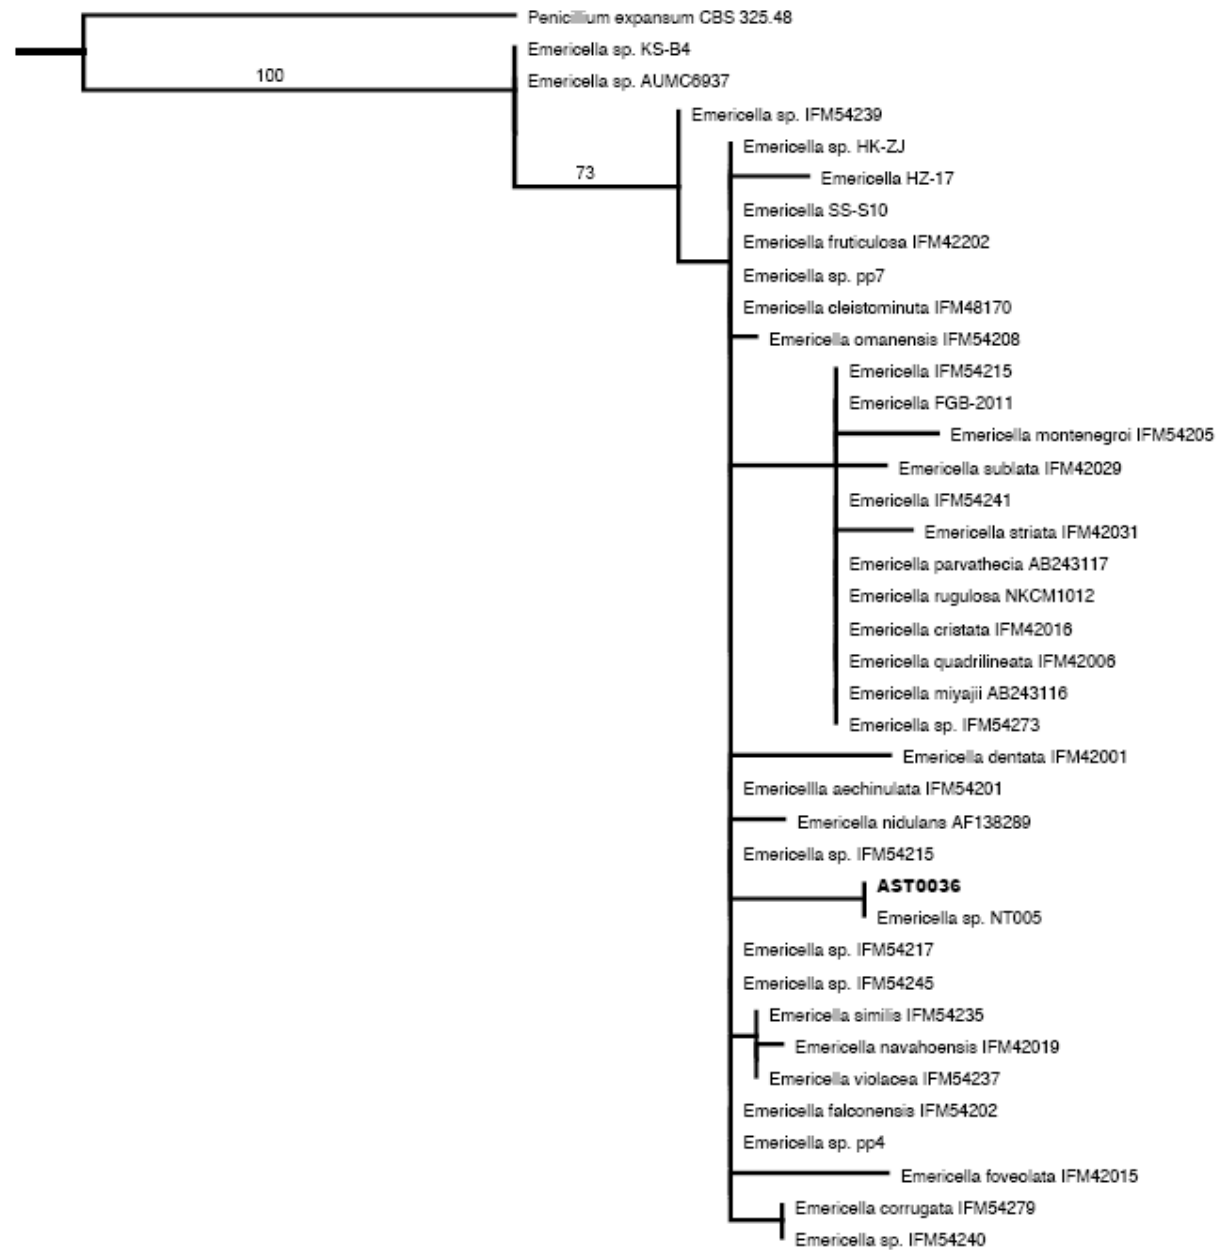

Supplement: NIHMS542610-supplement-1_si_001.pdf [file NIHMS542610-supplement-1_si_001.pdf]
